# Supplementary material for: Admission to psychiatric hospital for mental illnesses 2 years prechildbirth and postchildbirth in Scotland: a health informatics approach to assessing mother and child outcomes
Source: PubMed Central journal article supplement (PMC5588979; doi:10.1136/bmjopen-2017-016908), 2017-09-01
Supplement: bmjopen-2017-016908.draft_revisions.pdf [file bmjopen-2017-016908.draft_revisions.pdf]

# BMJ Open

BMJ Open is committed to open peer review. As part of this commitment we make the peer review history of every article we publish publicly available.

When an article is published we post the peer reviewers' comments and the authors' responses online. We also post the versions of the paper that were used during peer review. These are the versions that the peer review comments apply to.

The versions of the paper that follow are the versions that were submitted during the peer review process. They are not the versions of record or the final published versions. They should not be cited or distributed as the published version of this manuscript.

BMJ Open is an open access journal and the full, final, typeset and author-corrected version of record of the manuscript is available on our site with no access controls, subscription charges or pay-per-view fees (<http://bmjopen.bmj.com>).

If you have any questions on BMJ Open's open peer review process please email [editorial.bmjopen@bmj.com](mailto:editorial.bmjopen@bmj.com)

# BMJ Open

## Admission to Psychiatric Hospital for mental illnesses 2 years pre and post childbirth in Scotland: a health informatics approach to assessing mother and child outcomes.

|                                 |                                                                                                                                                                                                                                                                                                                                                                                |
|---------------------------------|--------------------------------------------------------------------------------------------------------------------------------------------------------------------------------------------------------------------------------------------------------------------------------------------------------------------------------------------------------------------------------|
| Journal:                        | <i>BMJ Open</i>                                                                                                                                                                                                                                                                                                                                                                |
| Manuscript ID                   | bmjopen-2017-016908                                                                                                                                                                                                                                                                                                                                                            |
| Article Type:                   | Research                                                                                                                                                                                                                                                                                                                                                                       |
| Date Submitted by the Author:   | 21-Mar-2017                                                                                                                                                                                                                                                                                                                                                                    |
| Complete List of Authors:       | Langan, Julie; University of Glasgow, Institute of Health and Wellbeing<br>McLean, Gary; University of Glasgow, Institute of Health and Wellbeing<br>Martin, Daniel; Glasgow University, Institute of Health and Wellbeing<br>Cantwell, Roch; Leverndale Hospital, Perinatal Mental Health Services<br>Smith, Daniel; University of Glasgow, Institute of Health and Wellbeing |
| <b>Primary Subject Heading</b>: | Mental health                                                                                                                                                                                                                                                                                                                                                                  |
| Secondary Subject Heading:      | Health informatics, Health services research, Obstetrics and gynaecology, Public health                                                                                                                                                                                                                                                                                        |
| Keywords:                       | post partum period, mental illness, child outcomes, Mother and Baby Unit, admission, readmission                                                                                                                                                                                                                                                                               |
|                                 |                                                                                                                                                                                                                                                                                                                                                                                |

SCHOLARONE™  
Manuscripts

1  
2  
3 **Admission to Psychiatric Hospital for mental illnesses 2 years pre and post childbirth in Scotland: a**  
4 **health informatics approach to assessing mother and child outcomes.**  
5

6 Julie Langan Martin<sup>1</sup>, Gary McLean<sup>1</sup>, Daniel Martin<sup>1</sup>, Roch Cantwell<sup>2</sup>, Daniel J. Smith<sup>1</sup>.  
7

8 <sup>1</sup>Institute of Health and Wellbeing, College of Medical, Veterinary and Life Sciences, University of  
9 Glasgow, Mental Health and Wellbeing, Gartnavel Royal Hospital, 1055 Great Western Road,  
10 Glasgow G12 0XH  
11

12 <sup>2</sup>Perinatal Mental Health Service & West of Scotland Mother & Baby Unit, Leverndale Hospital, 510  
13 Crookston Road, Glasgow G53 7TU  
14

15  
16 Corresponding Author Julie Langan Martin Institute of Health and Wellbeing, College of Medical,  
17 Veterinary and Life Sciences, University of Glasgow, Mental Health and Wellbeing, Gartnavel Royal  
18 Hospital, 1055 Great Western Road, Glasgow G12 0XH Phone No: +44 (0)141 211 3927 Fax :+44 (0)  
19 141 211 0356 Email: julie.langan@glasgow.ac.uk  
20

21  
22  
23 **KEYWORDS: post partum period, mental illness, child outcomes, Mother and Baby Unit, admission**  
24 **and readmission**  
25

26 WORD COUNT:

27 ABSTRACT: 300

28 MAIN TEXT: 2,519  
29  
30  
31  
32  
33  
34  
35  
36  
37  
38  
39  
40  
41  
42  
43  
44  
45  
46  
47  
48  
49  
50  
51  
52  
53  
54  
55  
56  
57  
58  
59  
60

**ABSTRACT**

**OBJECTIVE:** To identify factors associated with: admission to a specialist Mother and Baby Unit (MBU), readmission to psychiatric hospital and the impact of perinatal mental illness on early childhood development using a data linkage approach in the 2 years pre and post childbirth.

**METHODS:** Scottish maternity records (SMR02) were linked to psychiatric hospital admissions (SMR04). 3,290 pregnancy-related psychiatric admissions for 1,730 women were assessed. To investigate factors associated with MBU admission, the group of mothers admitted to a MBU were compared to those admitted to general psychiatric wards. To evaluate factors associated with future readmission, a group of mothers with a history of psychiatric admission were compared to those without a previous admission. To assess the impact of perinatal mental illness on early child development, a pragmatic indicator for 'high risk of impaired development', defined as a child who was recorded as requiring intensive treatment at any time under the health plan indicators (HPI) and/or who had no record of completing three doses of the 5 in 1 vaccine by 12 months was generated.

**RESULTS:** Women with a pregnancy-related psychiatric admission, who had a prior psychiatric admission were over two and a half times more likely to have at least one readmission during the two year follow-up period (OR:2.59, 95%CI 2.09-3.20). In total, 190 (11.0%) were admitted to a MBU. Women admitted to a MBU were more likely than those admitted to general psychiatric wards to come from affluent areas and were from older age groups. Almost one third (29%) of children born to mothers with a pregnancy-related psychiatric admission were assessed as high risk of developmental impairments.

**CONCLUSIONS:** A health informatics approach has potential for improving understanding of social and clinical factors which contribute to the outcomes of perinatal mental illness, as well as adverse developmental outcomes for offspring.

**Strengths and limitations of this study**

- Whole of Scotland childbirth and psychiatric admission data used for analyses, rather than local data only.
- Robust measure of socioeconomic status (Scottish Index of Multiple Deprivation) compared with other studies which have used educational status.
- These analyses used only psychiatric admission data, rather than outpatient psychiatric attendances.
- Our definition of 'high risk of developmental impairment' in offspring was a composite and pragmatic measure derived from the limited child health outcome data and there has been some inconsistency in the implementation of this across health boards.

1  
2  
3 BACKGROUND:

4  
5 Good maternal mental health is important for normal childhood development (Stein et al., 2014).  
6  
7 Maternal mental illness can disrupt optimal parenting processes, and can adversely affect childhood  
8 development, especially emotional development (Leis et al., 2013; Yarrow et al., 1984). In particular  
9 maternal mental illness may affect children's executive functioning (Hughes et al., 2013), and may be  
10 associated with increased rates of childhood depression (Murray et al., 2011). Maternal depression  
11 both during pregnancy and in the post-natal period is common and is estimated to affect between  
12 10 and 15% of women (O'Hara and Swain, 1996; Peralstein et al., 2009). While the prevalence of  
13 postpartum psychosis is relatively low at 1/1000 births (Terp and Mortensen, 1998), it is known to  
14 be associated with severe adverse outcomes, including maternal suicide and infanticide (Wisner et  
15 al., 1994).  
16  
17  
18  
19  
20  
21

22  
23 The joint admission of mentally ill mothers and their infants was pioneered by Thomas Main in 1948  
24 (Brockington, 1996). Since then the UK has acted as a leader in this field (Cazas and Glangeaud-  
25 Freudenthal, 2004). Currently in the UK where possible, postpartum women (and those in later  
26 pregnancy) with severe mental illnesses such as psychosis or severe depressive disorder are  
27 admitted to a specialised Mother and Baby Unit (MBU). The current Scottish Intercollegiate  
28 Guidelines Network (SIGN) clinical guidelines for the management of perinatal mood disorder reflect  
29 this (SIGN, 2012). MBUs are highly specialised, expensive and limited resources. Although there are  
30 currently 15 in England and 2 in Scotland (Royal College of Psychiatrists Quality Network for  
31 Perinatal Mental Health Services, 2016), access to this specialised service is poorer in many other  
32 High Income Countries (HICs; such as the US and Canada) and Low And Middle Income Countries  
33 (LAMICs). Given the importance of adverse childhood experiences (ACEs) in future health (Bellis et  
34 al., 2015, Felitti et al., 1998), perinatal mental illness and the potential impact it has on offspring is a  
35 priority area for research and practice.  
36  
37  
38  
39  
40  
41  
42  
43  
44

45 AIMS OF THE STUDY:

46  
47 The aim of the study was to use a data linkage approach to investigate factors associated with  
48 admission to a specialist Mother and Baby Unit (MBU) and factors associated with risk of future  
49 readmission in the 2 years pre and post childbirth. Finally, the impact of perinatal mental illness on  
50 the early childhood development of offspring was examined.  
51  
52  
53  
54  
55  
56  
57  
58  
59  
60

1  
2  
3 MATERIALS AND METHODS:

4 We used a dataset from the Information Services Division (ISD) of NHS Scotland which included all  
5 perinatal records (SMR02) between 2005-2009, linked to all psychiatric hospital admission records  
6 (SMR04) between 2003-2011. This dataset has been described elsewhere (Langan Martin et al.,  
7 2014). Early childhood developmental outcomes (assessed by a Health Visitor at both 10-day and 6-8  
8 week child-health checks) were also available. In total, 3,290 pregnancy-related psychiatric  
9 admissions for 1,730 women were assessed. For deliveries in 2005, psychiatric admissions between  
10 2003 (two years before) and 2007 (two years after) were captured. Similarly, for deliveries in 2009,  
11 psychiatric admissions from 2007 (two years before) until 2011 (two years after) were captured. For  
12 each maternity record, any psychiatric admission was reported by week for the 2 year pre-and post-  
13 childbirth periods. All statistical analyses were performed in STATA version 13.1 (STATA).  
14  
15  
16  
17  
18  
19  
20  
21

22 To investigate factors associated with admission to the MBU, we compared the group of mothers  
23 admitted to a MBU unit to those admitted to a general psychiatric ward up to 2 years post-partum  
24 on a range of sociodemographic characteristics (age, social deprivation and previous pregnancy). We  
25 also included the geographical location (health board area) of the mother.  
26  
27  
28  
29

30 To explore possible factors associated with future readmission, we compared a group of mothers  
31 with a history of prior psychiatric admission to those without a history of admission two or more  
32 years prior to the index admission. We compared those with and without a previous admission by  
33 diagnosis, Scottish Index of Multiple Deprivation (SIMD) quintile, age group, length of stay, whether  
34 the mother had at least one readmission, time of admission and whether the mother had a previous  
35 pregnancy. We used Cox regression to describe the association between each variable and the risk  
36 of admission between those with a history of prior psychiatric admission and those without. Where  
37 possible, odds ratios were adjusted for age and deprivation quintile.  
38  
39  
40  
41  
42  
43  
44

45 Finally to assess the impact of perinatal mental illness on early child development, we generated a  
46 pragmatic indicator for 'high risk of impaired development', defined as a child who was recorded as  
47 requiring intensive treatment at any time under the health plan indicators (HPI) and/or who had no  
48 record of completing three doses of the 5 in 1 vaccine by 12 months. The HPI is assessed at first visit,  
49 at six to eight weeks. For the HPI three possible outcomes can be recorded by the Health Visitor for  
50 the level of care required ('core', 'additional' and 'intensive'). It should be noted that there has been  
51 inconsistency in the implementation of the HPI across health boards, so results should be  
52 interpreted cautiously.  
53  
54  
55  
56  
57  
58  
59  
60

## RESULTS:

In total 190 (11.0%) of this sample were admitted to a specialist MBU in Scotland. Table 1 highlights some important differences between MBU versus non-MBU admissions. Firstly, women admitted to an MBU were significantly more likely to be admitted with non-affective psychosis (OR = 1.97, 95%CI 1.22-3.18), affective psychosis (OR = 2.44, 95%CI 1.37-4.33) and non-psychotic depressive episodes (OR = 1.93, 95%CI 1.42-1.63). It is also notable that women admitted to an MBU were significantly more likely to live within affluent areas (and less likely to come from deprived areas) and in general more likely to be from an older age group (31-35, 36-40 and over 40) (Table 1). Women admitted to an MBU were largely from the NHS Greater Glasgow and Clyde Health Board area (54.2% overall).

Table 1 also shows that MBU admissions were significantly less likely to have had a previous pregnancy and less likely to have had a previous psychiatric admission.

In total 562 (32.5%) of the 1,730 women had a history of prior psychiatric admission. Table 2 shows that this group were more likely to be admitted with a diagnosis of affective psychosis (7.3% vs. 2.6%, adjusted OR = 3.00, 95%CI 1.82-4.94) and non-affective psychosis (10.0% vs. 6.4%, adjusted OR = 1.55, 95%CI 1.07-2.25) but less likely to have an admission for a postpartum or non-psychotic depressive episode diagnosis. Those with a previous history of psychiatric admission were also significantly more likely to be located in the two most deprived quintiles and less likely to come from the two most affluent quintiles. Table 2 also shows they were less likely to be under 25 but significantly more likely to be from the 31-35 and 36-40 age groups. Those with a previous psychiatric admission were significantly more likely to have at least one readmission (54.6% vs. 31.5%, adjusted OR = 2.59, 95%CI 2.09-3.20). No significant differences were identified for length of stay, previous pregnancy or time of admission.

Table 3 highlights important differences in length of stay for MBU versus non-MBU admissions. It shows that women admitted to an MBU were significantly less likely to have brief stays in hospital (of 10 days or less) but significantly more likely to have stays of more than 10 days, and more than twice as likely to have had a stay of 21-40 days or 40 days or more. Table 3 also shows that although those women who attended an MBU and had a brief (less than 5 days) admission were less likely to have been readmitted, the opposite was true for those with longer admissions (21-40 days or 40 days or more). Longer admission appeared therefore to predict readmission for those who attended an MBU.



1  
2  
3 Table 4 shows that 518 (29.9%) of offspring were defined as being at 'high risk of developmental  
4 impairment' according to our criteria. Those at 'high risk' were more likely (although not statistically  
5 significantly) to have had a mother with non-affective psychosis (OR = 1.37, 95%CI 0.94-2.01) and  
6 significantly less likely to have a mother with a diagnosis of non-psychotic depression (OR = 0.65,  
7 95%CI 0.51-0.83). It is notable that they were significantly more likely to come from the most  
8 deprived quintiles and less likely to be from more affluent quintiles. No differences were found by  
9 age of mother. Those children identified as 'high risk' were more likely to have had a mother with a  
10 history of a previous psychiatric admission and more likely to be readmitted during the assessment  
11 period.  
12  
13  
14  
15  
16  
17

#### 18 19 DISCUSSION:

20 The aim of this study was to assess the extent to which sociodemographic factors and perinatal  
21 mental illness affects treatment and outcomes for both mothers and children. We covered three  
22 main areas: impact of prior psychiatric admission on future admissions, the role of MBUs and factors  
23 associated with adverse child development outcomes.  
24  
25  
26  
27

28  
29 In this large sample of Scottish women with a childbirth-related psychiatric admission, those with a  
30 record of prior psychiatric admission (compared to those with no history of admission) were more  
31 than two and a half times more likely to have at least one readmission during the two-year study  
32 follow-up period. They also had a different pattern of admission diagnosis: they were more likely to  
33 be admitted with a diagnosis of affective psychosis (predominantly bipolar disorder) and non-  
34 affective psychosis (predominantly schizophrenia) but less likely to have an admission for a non-  
35 psychotic depressive diagnosis. In line with previous work, this confirms that childbirth represents a  
36 period of elevated risk for relapse for women known to have serious psychiatric disorders such as  
37 bipolar disorder and schizophrenia (Terp and Mortensen, 1998;Kendell et al., 1987).  
38  
39  
40  
41  
42  
43  
44

45 There was also an important difference between those with and without a previous psychiatric  
46 admission in terms of socioeconomic deprivation. Women with a previous history of psychiatric  
47 admission were more likely to live in the two most deprived quintiles and less likely to come from  
48 the two most affluent quintiles. Studies investigating the link between deprivation and admission  
49 rate are limited. Some authors have described a link between psychiatric diagnosis, deprivation and  
50 admission rate (Harrison et al., 1995) and others have suggested a link between socio-economic  
51 status and admission to forensic psychiatry services (Coid et al., 2001). Further more detailed  
52 investigation in this area is required.  
53  
54  
55  
56  
57  
58  
59  
60

1  
2  
3  
4  
5  
6  
7  
8  
9  
10  
11  
12  
13  
14  
15  
16  
17  
18  
19  
20  
21  
22  
23  
24  
25  
26  
27  
28  
29  
30  
31  
32  
33  
34  
35  
36  
37  
38  
39  
40  
41  
42  
43  
44  
45  
46  
47  
48  
49  
50  
51  
52  
53  
54  
55  
56  
57  
58  
59  
60

In this study, we compared MBU admissions with admissions to a general psychiatric ward on a range of demographic and clinical variables. An important finding was that women admitted to a MBU were significantly more likely to come from socially affluent areas (and less likely to come from socially deprived areas) and in general were more likely to be from the older age groups. It is possible that this might reflect a health inequality in terms of access to MBU admission but this is a question which requires further research. To date literature exploring accessibility to MBUs is limited. There is only one systematic review investigating outcomes for women admitted to a mother and baby unit (Gillham and Wittkowski, 2015). In this study accessibility to MBU was not reported and no objective marker of deprivations (such as SIMD) was included (Gillham and Wittkowski, 2015).

We found that admissions for those admitted to an MBU tended to be longer. This maybe a consequence of a more severe presentation requiring more intensive support or may be related to the need for a higher level of social functioning to ensure safe care for mothers and their babies on discharge from hospital. Longer length of stay in an MBU compared to a general psychiatric ward was also reported by Cantwell et al., (2002). However, in our study, we also found that readmission rates for those with longer stays were significantly higher for MBU attendees. Interestingly other studies have reported that “average length of stay has been systematically found to be negatively associated with readmission risk/rates” within a general adult psychiatric setting (Kalseth et al., 2016).

Several notable findings arose from our comparison of mothers of children identified as at ‘high risk of developmental impairment’. Firstly, almost one third (29%) of children fell into this category. This rate is similar to a study by Whitmore et al., (2011) who reported that social services were involved in 31.6% of all admissions to their MBU in Birmingham and 10% of admissions resulted in separate discharges (Whitmore et al., 2011). Secondly, our findings indicate that children in the ‘high risk’ group were more likely to come from deprived locations, have mothers with a previous psychiatric admission and have had a mother admitted with a non-affective psychosis (schizophrenia). This finding is again similar to that by Whitmore et al., (2011) who reported that women with a diagnosis of schizophrenia were discharged separately more often than other groups. However Whitmore et al., (2011) did not report deprivation status or previous psychiatric admission. Taken together, our findings suggest that there may be some benefit to identifying mothers at particularly high risk in terms of adverse developmental outcomes for their children, such as mothers living in more

1  
2  
3 deprived communities who are known to have a history of previous psychiatric admissions for  
4 schizophrenia.  
5  
6

7  
8 **STRENGTHS AND LIMITATIONS:**

9  
10 Strengths of this study include the completeness of the sample, which was obtained from record  
11 linkage for the whole of Scotland. However, some limitations in this work are acknowledged. Firstly,  
12 only psychiatric admission data were used, with no use of out-patient data. Our findings are  
13 therefore focused on the more severe end of the mental illness spectrum. Although we were able to  
14 determine if individuals had had a previous psychiatric admission, information about the number of  
15 previous admissions, family support, or access to Crisis teams were not available. The comparisons  
16 of women admitted to MBUs with women admitted to general psychiatric wards needs to be  
17 interpreted cautiously. This is particularly in relation to the timing of admissions in relation to  
18 childbirth, as women will only be admitted to MBUs in the very late stages of pregnancy and in the  
19 first year post-partum. The general psychiatric admissions included admissions up to 2 years pre  
20 partum and 2 years post-partum. Limited information about time and length stay at an MBU  
21 prevented any cost analysis being undertaken. Our definition of 'high risk of developmental  
22 impairment' in offspring was a composite and pragmatic measure derived from the limited child  
23 health outcome data which was available to us from record linkage. There has also been some  
24 inconsistency in the implementation of the HPI across health boards. A more detailed and  
25 comprehensive assessment of child development in this group of mothers is therefore warranted.  
26  
27  
28  
29  
30  
31  
32  
33  
34  
35  
36

37 **CONCLUSION:**

38  
39 In conclusion, this study found that a health informatics/data linkage approach has considerable  
40 potential for improving our understanding of the social and clinical factors which contribute to  
41 perinatal mental illness in mothers in Scotland, as well as adverse developmental outcomes for their  
42 children. To date there has been no systematic assessment of the benefits (or adverse effects) of  
43 specialised MBUs in Scotland. Although this study identified that MBUs appear to be looking after  
44 women with more severe psychiatric disorders in the period soon after childbirth, there was also the  
45 possibility of a health inequality in terms of access to MBUs (specifically that mothers living in more  
46 deprived areas and younger mothers may not be accessing MBU admission as often as might be  
47 expected).  
48  
49  
50  
51  
52  
53  
54  
55  
56  
57  
58  
59  
60

**Table 1. Admissions to Mother Baby Unit (MBU) versus general psychiatric ward admissions**

|                                        | MBU admission<br>Number (%) | Non-MBU admission<br>Number (%) | Odds ratio, adjusted<br>by age and<br>deprivation (95%CI) |
|----------------------------------------|-----------------------------|---------------------------------|-----------------------------------------------------------|
| Total                                  | 190 (11.0)                  | 1,539 (89)                      |                                                           |
| <b>Diagnosis</b>                       |                             |                                 |                                                           |
| Non affective psychosis                | 24 (12.6)                   | 107 (7.0)                       | 1.97 (1.22-3.18)                                          |
| Affective psychosis                    | 18 (9.5)                    | 53 (3.4)                        | 2.44 (1.37-4.33)                                          |
| Post-partum (0-12 weeks) psychosis     | 18 (9.5)                    | 87 (5.7)                        | 1.56 (0.91-2.70)                                          |
| Non psychotic depressive episodes      | 85 (44.7)                   | 447 (29.0)                      | 1.93 (1.42-1.63)                                          |
| Any other diagnosis                    | 130 (68.4)                  | 1,292 (84.0)                    | 0.45 (0.32-0.63)                                          |
| <b>Deprivation Quintile</b>            |                             |                                 |                                                           |
| Most deprived                          | 64 (33.7)                   | 656 (43.4)                      | 0.68 (0.49-0.93)                                          |
| 2                                      | 34 (17.9)                   | 336 (22.2)                      | 0.76 (0.51-1.13)                                          |
| 3                                      | 28 (14.7)                   | 246 (16.3)                      | 0.88 (0.58-1.31)                                          |
| 4                                      | 37 (19.5)                   | 169 (10.2)                      | 2.00 (1.35-2.96)                                          |
| Least deprived                         | 27 (14.2)                   | 105 (6.9)                       | 2.33 (1.49-3.65)                                          |
| <b>Age group</b>                       |                             |                                 |                                                           |
| Under 20                               | 16 (8.4)                    | 172 (11.2)                      | 0.78 (0.45-1.34)                                          |
| 20-25                                  | 40 (21.1)                   | 465 (30.2)                      | 0.65 (0.45-0.95)                                          |
| 26-30                                  | 47 (24.7)                   | 407 (26.4)                      | 0.90 (0.63-1.29)                                          |
| 31-35                                  | 50 (26.3)                   | 293 (19.0)                      | 1.38 (0.97-1.96)                                          |
| 36-40                                  | 31 (16.3)                   | 170 (11.0)                      | 1.49 (1.03-1.58)                                          |
| Over40                                 | 6 (3.2)                     | 32 (2.1)                        | 1.55 (0.63-3.80)                                          |
| <b>Geographical location</b>           |                             |                                 |                                                           |
| Greater Glasgow&Clyde                  | 103 (54.2)                  | 389 (25.3)                      | 3.50 (2.57-4.76)                                          |
| Lothian                                | 55 (29.0)                   | 169 (11.0)                      | 3.30 (2.32-4.96)                                          |
| Lanarkshire                            | 12 (6.3)                    | 169 (11.0)                      | 0.54 (0.29-1.00)                                          |
| Any other Health Board                 | 20 (10.5)                   | 812 (52.7)                      | 0.02 (0.01 to 0.03)                                       |
| With at least one readmission          | 64 (33.7)                   | 610 (39.6)                      | 0.81 (0.56-1.06)                                          |
| Had previous pregnancy                 | 95 (50.0)                   | 935 (60.8)                      | 0.57 (0.41-0.78)                                          |
| History of prior psychiatric admission | 43 (22.6)                   | 519 (33.7)                      | 0.57 (0.40-0.83)                                          |
| <b>Time of first admission</b>         |                             |                                 |                                                           |
| Post-partum (0-12-weeks)               | 102 (53.7)                  | 125 (8.1)                       | 11.96 (8.4-16.8)                                          |

Note: women could have more than one diagnosis so numbers are greater than the number of women. In total 27 women had no SIMD quintile assigned due to missing or incorrect postcode

**Table 2. Characteristics of those with history of prior psychiatric admission versus those without**

|                                   | Previous admission  | No previous admission | Odds ratio adjusted by age and deprivation (95%CI) |
|-----------------------------------|---------------------|-----------------------|----------------------------------------------------|
|                                   | Number (% of total) | Number (% of total)   |                                                    |
| Total                             | 562 (32.5)          | 1,168 (67.5)          |                                                    |
| <b>Diagnosis</b>                  |                     |                       |                                                    |
| Non affective psychosis           | 56 (10.0)           | 75 (6.4)              | 1.55 (1.07-2.25)                                   |
| Affective psychosis               | 41 (7.3)            | 30 (2.6)              | 3.00 (1.82-4.94)                                   |
| Post-partum psychosis             | 57 (10.1)           | 170 (14.6)            | 0.36 (0.20-0.64)                                   |
| Non psychotic depressive episodes | 137 (24.4)          | 395 (33.8)            | 0.63 (0.50-0.79)                                   |
| Any other diagnosis               | 450 (80.1)          | 973 (83.3)            | 0.78 (0.60-1.02)                                   |
| <b>Deprivation Quintile</b>       |                     |                       |                                                    |
| Most deprived                     | 251 (45.7)          | 470 (40.7)            | 1.31 (1.07-1.61)                                   |
| 2                                 | 131 (23.9)          | 239 (20.7)            | 1.11 (0.87-1.42)                                   |
| 3                                 | 85 (15.5)           | 189 (16.4)            | 0.90 (0.68-1.20)                                   |
| 4                                 | 54 (9.8)            | 152 (13.2)            | 0.68 (0.49-0.95)                                   |
| Least deprived                    | 28 (5.1)            | 104 (9.0)             | 0.48 (0.31-0.75)                                   |
| <b>Age group</b>                  |                     |                       |                                                    |
| Under 20                          | 37 (6.6)            | 152 (13.0)            | 0.44 (0.30-0.64)                                   |
| 20-25                             | 146 (26.0)          | 359 (30.7)            | 0.78 (0.62-0.98)                                   |
| 26-30                             | 160 (28.5)          | 294 (25.2)            | 1.19 (0.95-1.50)                                   |
| 31-35                             | 126 (22.4)          | 217 (18.6)            | 1.31 (1.01-1.68)                                   |
| 36-40                             | 80 (14.2)           | 121 (10.4)            | 1.45 (1.07-1.97)                                   |
| Over40                            | 13 (2.3)            | 25 (2.1)              | 1.01 (0.50-2.03)                                   |
| <b>Length of stay</b>             |                     |                       |                                                    |
| Five days or less                 | 203 (36.1)          | 472 (40.4)            | 0.87 (0.70-1.09)                                   |
| 6-10 days                         | 112 (19.9)          | 234 (20.0)            | 0.99 (0.76-1.28)                                   |
| 11-20 days                        | 104 (18.5)          | 212 (18.2)            | 0.95 (0.73-1.24)                                   |
| 21-40 days                        | 71 (12.6)           | 150 (12.8)            | 0.99 (0.73-1.26)                                   |
| 40 plus days                      | 72 (12.8)           | 100 (8.6)             | 1.50 (1.07-2.09)                                   |
| With at least one readmission     | 307 (54.6)          | 368 (31.5)            | 2.59 (2.09-3.20)                                   |
| Had previous pregnancy            | 359 (63.9)          | 671 (57.5)            | 1.03 (0.82-1.29)                                   |
| <b>Time of first admission</b>    |                     |                       |                                                    |
| Post-partum (0-12-weeks)          | 57 (10.1)           | 170 (14.6)            | 0.71 (0.48-1.02)                                   |

Note: women could have more than one diagnosis so numbers are greater than the number of women. In total 27 women had no SIMD quintile assigned due to missing or incorrect postcode

**Table 3. Comparison of MBU versus non-MBU admissions**

|                            | MBU admission | Non-MBU admission | Odds ratio adjusted by age and deprivation (95%CI) |
|----------------------------|---------------|-------------------|----------------------------------------------------|
|                            | Number (%)    | Number (%)        |                                                    |
| <b>Length of admission</b> |               |                   |                                                    |
| Five days or less          | 35 (18.4)     | 640 (41.6)        | 0.34 (0.23-0.50)                                   |
| 6-10 days                  | 25 (13.2)     | 320 (20.8)        | 0.59 (0.39-0.92)                                   |
| 11-20 days                 | 42 (22.1)     | 274 (17.8)        | 1.27 (0.86-1.85)                                   |
| 21-40 days                 | 49 (25.8)     | 172 (11.2)        | 2.51 (1.73-3.63)                                   |
| 40 plus days               | 39 (20.4)     | 133 (8.6)         | 2.48 (1.65-3.71)                                   |
| <b>Readmission rates</b>   |               |                   |                                                    |
| Five days or less          | 12 (18.8)     | 218 (35.7)        | 0.41 (0.21-0.79)                                   |
| 6-10 days                  | 10 (15.6)     | 133 (21.8)        | 0.66 (0.32-1.33)                                   |
| 11-20 days                 | 12 (18.8)     | 121 (19.8)        | 0.93 (0.48-1.80)                                   |
| 21-40 days                 | 15 (23.4)     | 77 (12.6)         | 2.11 (1.13-3.96)                                   |
| 40 plus days               | 15 (23.4)     | 61 (10.0)         | 2.75 (1.45-5.20)                                   |

**Table 4. Characteristics of mothers with children defined as being at 'high risk of developmental impairment'**

|                                        | At risk             | Not at risk         | Odds ratio adjusted by age and deprivation (95%CI) |
|----------------------------------------|---------------------|---------------------|----------------------------------------------------|
|                                        | Number (% of total) | Number (% of total) |                                                    |
| Total                                  | 518 (29.9)          | 1,212 (70.1)        |                                                    |
| <b>Diagnosis</b>                       |                     |                     |                                                    |
| Non affective psychosis                | 49 (9.5)            | 82 (6.7)            | 1.37 (0.94-2.01)                                   |
| Affective psychosis                    | 22 (4.3)            | 49 (4.0)            | 1.24 (0.73-2.12)                                   |
| Post-partum psychosis                  | 21 (4.1)            | 84 (6.9)            | 0.62 (0.37-1.03)                                   |
| Non psychotic depressive episodes      | 127 (24.5)          | 405 (33.4)          | 0.65 (0.51-0.83)                                   |
| Any other diagnosis                    | 426 (82.2)          | 997 (82.3)          | 0.93 (0.70-1.22)                                   |
| <b>Deprivation Quintile</b>            |                     |                     |                                                    |
| Most deprived                          | 274 (54.0)          | 448 (37.5)          | 1.88 (1.52-2.32)                                   |
| 2                                      | 112 (22.1)          | 227 (21.5)          | 1.03 (0.80-1.33)                                   |
| 3                                      | 61 (12.0)           | 214 (17.9)          | 0.61 (0.45-0.84)                                   |
| 4                                      | 36 (7.1)            | 169 (14.1)          | 0.46 (0.32-0.68)                                   |
| Least deprived                         | 24 (7.3)            | 108 (9.3)           | 0.51 (0.32-0.81)                                   |
| <b>Age group</b>                       |                     |                     |                                                    |
| Under 20                               | 61 (11.8)           | 128 (10.6)          | 1.02 (0.73-1.45)                                   |
| 20-25                                  | 154 (29.7)          | 351 (29.0)          | 0.91 (0.72-1.15)                                   |
| 26-30                                  | 154 (29.7)          | 300 (24.8)          | 1.32 (0.98-1.67)                                   |
| 31-35                                  | 90 (17.4)           | 253 (20.9)          | 0.90 (0.69-1.17)                                   |
| 36-40                                  | 47 (9.1)            | 154 (12.7)          | 0.73 (0.51-1.03)                                   |
| Over40                                 | 12 (2.3)            | 26 (2.2)            | 1.15 (0.56-2.33)                                   |
| <b>Length of stay</b>                  |                     |                     |                                                    |
| Five days or less                      | 213 (41.1)          | 456 (37.6)          | 1.16 (0.93-1.44)                                   |
| 6-10 days                              | 103 (19.9)          | 244 (20.1)          | 0.91 (0.70-1.19)                                   |
| 11-20 days                             | 93 (18.0)           | 223 (18.4)          | 0.98 (0.73-1.29)                                   |
| 21-40 days                             | 48 (11.2)           | 166 (13.7)          | 0.84 (0.60-1.17)                                   |
| 40 plus days                           | 51 (9.9)            | 123 (10.2)          | 0.98 (0.68-1.40)                                   |
| With at least one readmission          | 235 (45.4)          | 440 (36.3)          | 1.35 (1.08-1.67)                                   |
| Had previous pregnancy                 | 319 (61.6)          | 711 (58.9)          | 1.11 (0.89-1.40)                                   |
| History of prior psychiatric admission | 215 (41.5)          | 347 (28.6)          | 1.76 (1.41-2.21)                                   |
| <b>Time of first admission</b>         |                     |                     |                                                    |
| Post-partum (0-12-weeks)               | 73 (14.1)           | 154 (12.7)          | 1.31 (0.96-1.79)                                   |

Note: women could have more than one diagnosis so numbers are greater than the number of women. In total 27 women had no SIMD quintile assigned due to missing or incorrect postcode

1  
2  
3 Contributor ship statement:

4 GM undertook the data analyses. JLM and DJM wrote the initial draft of the paper. GM, RC and  
5 DJM were involved in the drafting of the paper  
6  
7

8 Competing interests:

9 All authors report no competing interests.  
10  
11

12 Funding:

13 This project was funded by a CSO Health Informatics Call Grant  
14  
15

16 Data sharing statement:

17 Data included in the study are available to the authors only  
18  
19  
20  
21  
22  
23  
24  
25  
26  
27  
28  
29  
30  
31  
32  
33  
34  
35  
36  
37  
38  
39  
40  
41  
42  
43  
44  
45  
46  
47  
48  
49  
50  
51  
52  
53  
54  
55  
56  
57  
58  
59  
60



## REFERENCES:

Bellis MA, Hughes K, Leckenby N, Hardcastle KA, Perkins C, Lowey H. Measuring mortality and the burden of adult disease associated with adverse childhood experiences in England: a national survey. *J Public Health (Oxf)*. 2015; 37(3):445-54. doi: 10.1093/pubmed/fdu065. Epub 2014 Aug 30.

Brockington IF. Oxford: Oxford University Press; 1996. *Motherhood and Mental Health*

Cantwell R, Sisodia N, Oates M. A comparison of mother & baby admissions to a specialist inpatient service with postnatal admissions to generic services. 2002 *Proceedings of the Marce Society Biennial Conference, Sydney*.

Cazas O, Glangeaud-Freudenthal NM-C. The history of Mother-Baby Units (MBUs) in France and Belgium and of the French version of the Marcé checklist. *Archives of Women's Mental Health*. 2004;7(1):53-58. doi:10.1007/s00737-003-0046-0.

Coid J, Kahtan N, Cook A, Gault S, Jarman B. Predicting admission rates to secure forensic psychiatry services. *Psychol Med*. 2001 Apr;31(3):531-9.

Felitti VJ, Anda RF, Nordenberg D, Williamson DF, Spitz AM, Edwards V, Koss MP, Marks JS. Relationship of childhood abuse and household dysfunction to many of the leading causes of death in adults. The Adverse Childhood Experiences Study. *Am J Prev Med*. 1998;14:245-258

Gillham R, Wittkowski A. Outcomes for women admitted to a mother and baby unit: a systematic review. *International Journal of Women's Health*. 2015;7:459-476. doi:10.2147/IJWH.S69472.

Harrison J, Barrow S, Creed F. Social deprivation and psychiatric admission rates among different diagnostic groups. *Br J Psychiatry*. 1995 Oct;167(4):456-62.

Hughes C, Roman G, Hart MJ, Ensor R. Does maternal depression predict young children's executive function? - a 4-year longitudinal study. *J Child Psychol Psychiatry*. 2013 Feb;54(2):169-77. doi: 10.1111/jcpp.12014. Epub 2012 Nov

Kalseth J, Lassemo E, Wahlbeck K, Haaramo P, Magnussen J. Psychiatric readmissions and their association with environmental and health system characteristics: a systematic review of the literature. *BMC Psychiatry*. 2016;16:376. doi:10.1186/s12888-016-1099-8.

Kendell RE, Chalmers JC, Platz C. Epidemiology of puerperal psychoses. *Br J Psychiatry* 1987;150:662-73. doi:10.1192/bjp.150.5.662

Langan-Martin, J., McLean, G., Cantwell, R., and Smith, D. J. (2016) Admission to psychiatric hospital in the early and late post-partum periods: Scottish national linkage study. *BMJ Open*, 6(1), e008758. (doi:10.1136/bmjopen-2015-008758) (PMID:26733566)

Leis JA, Heron J, Stuart EA, Mendelson T. Associations between maternal mental health and child emotional and behavioral problems: does prenatal mental health matter? *J Abnorm Child Psychol* 2013; 42: 161-71

Murray L., Halligan S.L., & Cooper P.J. (2010). Effects of postnatal depression on mother-infant interactions, and child development In Wachs B.G., editor. (Ed.), *Handbook of infant development* (pp. 192-220). Malden: Wiley-Blackwell.

1  
2  
3  
4 National Institute for Health and Care Excellence. Antenatal and postnatal mental health: Clinical  
5 management and service guidance. NICE guidelines [CG45]. February, 2007. [Last accessed on].  
6 Available from: <http://guidance.nice.org.uk/CG45/Guidance> .  
7

8 O'Hara MW, Swain AM Rates and risk of postpartum depression: a meta-analysis *Int Rev Psychiatry*,  
9 8 (1996), pp. 37–54  
10

11 Pearlstein T, Howard M, Salisbury A, Zlotnick C. Postpartum depression *Am J ObstetGynecol*, 200  
12 (2009), pp. 357–364  
13

14 Royal College of Psychiatrists Quality Network for Perinatal Mental Health Services  
15 (2016).<http://www.rcpsych.ac.uk/pdf/Annual%20Inpatient%20Report%20Final%20Draft.pdf>  
16 Accessed 16/03/2017  
17

18 SIGN 127 Management of perinatal mood disorders Available at:  
19 <http://www.sign.ac.uk/pdf/sign127.pdf> Accessed 01/03/2017  
20

21 Stein A, Pearson RM, Goodman SH, Rapa E, Rahman A, McCallum M, Howard LM, Pariante CMEffects  
22 of perinatal mental disorders on the fetus and child. *Lancet*. 2014 Nov 15;384(9956):1800-19. doi:  
23 10.1016/S0140-6736(14)61277-0. Epub 2014 Nov 14.  
24  
25

26 STATA: <https://www.stata.com/stata-news/news28-4/stata13.1/>  
27  
28

29 Terp IM, Mortensen PB. Post-partum psychoses. Clinical diagnoses and relative risk of admission  
30 after parturition. *Br J Psychiatry* 1998;172:521–6.  
31  
32

33 Yarrow L.J., MacTurk R.H., Vietze P.M., McCarthy M.E., Klein R.P., McQuinston S. Development  
34 course of parental stimulation and its relationship to mastery motivation during  
35 infancy. *Developmental Psychology*. 1984;20:492–503.  
36

37 Whitmore J, Heron J, Wainscott G. Predictors of parenting concern in a Mother and Baby Unit over a  
38 10-year period. *Int J Soc Psychiatry*. 2011 Sep;57(5):455-61. doi: 10.1177/0020764010365412. Epub  
39 2010 Apr 13.  
40

41 Wisner KL, Peindl K, Hanusa BH. Symptomatology of affective and psychotic illnesses related to  
42 childbearing. *J Affect Disord* 1994;30:77–87. doi:10.1016/0165-0327(94)90034-5  
43  
44  
45  
46  
47  
48  
49  
50  
51  
52  
53  
54  
55  
56  
57  
58  
59  
60

STROBE Statement—checklist of items that should be included in reports of observational studies

|                              | Item No | Page Number discussed                                                                                                                                                                                                                                                                                                   |
|------------------------------|---------|-------------------------------------------------------------------------------------------------------------------------------------------------------------------------------------------------------------------------------------------------------------------------------------------------------------------------|
| <b>Title and abstract</b>    | 1       | (a) Page 1<br>(b) Page 2                                                                                                                                                                                                                                                                                                |
| <b>Introduction</b>          |         |                                                                                                                                                                                                                                                                                                                         |
| Background/rationale         | 2       | Page 4                                                                                                                                                                                                                                                                                                                  |
| Objectives                   | 3       | Page 4                                                                                                                                                                                                                                                                                                                  |
| <b>Methods</b>               |         |                                                                                                                                                                                                                                                                                                                         |
| Study design                 | 4       | Page 5                                                                                                                                                                                                                                                                                                                  |
| Setting                      | 5       | Page 5                                                                                                                                                                                                                                                                                                                  |
| Participants                 | 6       | (a) <i>Cross-sectional study</i> —Page 5<br>(b) <i>No matching</i>                                                                                                                                                                                                                                                      |
| Variables                    | 7       | Page 5                                                                                                                                                                                                                                                                                                                  |
| Data sources/<br>measurement | 8*      | Page 5                                                                                                                                                                                                                                                                                                                  |
| Bias                         | 9       | Page 9                                                                                                                                                                                                                                                                                                                  |
| Study size                   | 10      | Page 5                                                                                                                                                                                                                                                                                                                  |
| Quantitative variables       | 11      | Page 5                                                                                                                                                                                                                                                                                                                  |
| Statistical methods          | 12      | (a) Page 5<br>(b) Describe any methods used to examine subgroups and interactions Page 5<br>(c) Explain how missing data were addressed Page 5<br>(d) <i>Cross-sectional study</i> —If applicable, describe analytical methods taking account of sampling strategy Page 5<br>(e) Describe any sensitivity analyses: n/a |

Continued on next page

**Results**

|                  |     |                                                                                                                                                                                                                                                                                                              |
|------------------|-----|--------------------------------------------------------------------------------------------------------------------------------------------------------------------------------------------------------------------------------------------------------------------------------------------------------------|
| Participants     | 13* | (a) Page 5<br>(b) n/a<br>(c) N/a                                                                                                                                                                                                                                                                             |
| Descriptive data | 14* | (a) Page 6<br>(b) n/a<br>(c) <i>Cohort study</i> —Summarise follow-up time (eg, average and total amount) n/a                                                                                                                                                                                                |
| Outcome data     | 15* | <i>Cohort study</i> —Report numbers of outcome events or summary measures over time<br><i>Case-control study</i> —Report numbers in each exposure category, or summary measures of exposure<br><i>Cross-sectional study</i> —Report numbers of outcome events or summary measures Pages 6 and 7 & Tables 1-4 |
| Main results     | 16  | (a) Pages 6 and 7 & Tables 1-4<br>(b) Report category boundaries when continuous variables were categorized n/a<br>(c) If relevant, consider translating estimates of relative risk into absolute risk for a meaningful time period – n/a                                                                    |
| Other analyses   | 17  | Report other analyses done—eg analyses of subgroups and interactions, and sensitivity analyses Pages 6 and 7 & Tables 1-4                                                                                                                                                                                    |

**Discussion**

|                  |    |                                                                                                                                                                                      |
|------------------|----|--------------------------------------------------------------------------------------------------------------------------------------------------------------------------------------|
| Key results      | 18 | Summarise key results with reference to study objectives Page 7                                                                                                                      |
| Limitations      | 19 | Discuss limitations of the study, taking into account sources of potential bias or imprecision. Discuss both direction and magnitude of any potential bias Pages 3 and 9             |
| Interpretation   | 20 | Give a cautious overall interpretation of results considering objectives, limitations, multiplicity of analyses, results from similar studies, and other relevant evidence Pages 7-9 |
| Generalisability | 21 | Discuss the generalisability (external validity) of the study results pages 7-9                                                                                                      |

**Other information**

|         |    |                                                                                                                                                                       |
|---------|----|-----------------------------------------------------------------------------------------------------------------------------------------------------------------------|
| Funding | 22 | Give the source of funding and the role of the funders for the present study and, if applicable, for the original study on which the present article is based page 14 |
|---------|----|-----------------------------------------------------------------------------------------------------------------------------------------------------------------------|

# BMJ Open

## Admission to Psychiatric Hospital for mental illnesses 2 years pre and post childbirth in Scotland: a health informatics approach to assessing mother and child outcomes.

|                                 |                                                                                                                                                                                                                                                                                                                                                                                |
|---------------------------------|--------------------------------------------------------------------------------------------------------------------------------------------------------------------------------------------------------------------------------------------------------------------------------------------------------------------------------------------------------------------------------|
| Journal:                        | <i>BMJ Open</i>                                                                                                                                                                                                                                                                                                                                                                |
| Manuscript ID                   | bmjopen-2017-016908.R1                                                                                                                                                                                                                                                                                                                                                         |
| Article Type:                   | Research                                                                                                                                                                                                                                                                                                                                                                       |
| Date Submitted by the Author:   | 26-May-2017                                                                                                                                                                                                                                                                                                                                                                    |
| Complete List of Authors:       | Langan, Julie; University of Glasgow, Institute of Health and Wellbeing<br>McLean, Gary; University of Glasgow, Institute of Health and Wellbeing<br>Martin, Daniel; Glasgow University, Institute of Health and Wellbeing<br>Cantwell, Roch; Leverndale Hospital, Perinatal Mental Health Services<br>Smith, Daniel; University of Glasgow, Institute of Health and Wellbeing |
| <b>Primary Subject Heading</b>: | Mental health                                                                                                                                                                                                                                                                                                                                                                  |
| Secondary Subject Heading:      | Health informatics, Health services research, Public health                                                                                                                                                                                                                                                                                                                    |
| Keywords:                       | mental illness, child outcomes, Mother and Baby Unit, psychiatric admissions                                                                                                                                                                                                                                                                                                   |
|                                 |                                                                                                                                                                                                                                                                                                                                                                                |

SCHOLARONE™  
Manuscripts

**Admission to Psychiatric Hospital for mental illnesses 2 years pre and post childbirth in Scotland: a health informatics approach to assessing mother and child outcomes.**

Julie Langan Martin<sup>1</sup>, Gary McLean<sup>1</sup>, Daniel Martin<sup>1</sup>, Roch Cantwell<sup>2</sup>, Daniel J. Smith<sup>1</sup>.

<sup>1</sup>Institute of Health and Wellbeing, College of Medical, Veterinary and Life Sciences, University of Glasgow, Mental Health and Wellbeing, Gartnavel Royal Hospital, 1055 Great Western Road, Glasgow G12 0XH

<sup>2</sup>Perinatal Mental Health Service & West of Scotland Mother & Baby Unit, Leverndale Hospital, 510 Crookston Road, Glasgow G53 7TU

Corresponding Author Julie Langan Martin Institute of Health and Wellbeing, College of Medical, Veterinary and Life Sciences, University of Glasgow, Mental Health and Wellbeing, Gartnavel Royal Hospital, 1055 Great Western Road, Glasgow G12 0XH Phone No: +44 (0)141 211 3927 Fax :+44 (0) 141 211 0356

Email: Julie.langan@glasgow.ac.uk

**KEYWORDS: mental illness, child outcomes, Mother and Baby Unit and hospital admission**

**WORD COUNT: ABSTRACT: 300 MAIN TEXT: 2716**

**ABSTRACT**

**OBJECTIVE:** To identify factors associated with: admission to a specialist Mother and Baby Unit (MBU), and the impact of perinatal mental illness on early childhood development using a data linkage approach in the 2 years pre and post childbirth.

**METHODS:** Scottish maternity records (SMR02) were linked to psychiatric hospital admissions (SMR04). 3,290 pregnancy-related psychiatric admissions for 1,730 women were assessed. To investigate factors associated with MBU admission, the group of mothers admitted to a MBU were compared to those admitted to general psychiatric wards. To assess the impact of perinatal mental illness on early child development, a pragmatic indicator for 'at potential risk of adversity', defined as a child who was recorded as requiring intensive treatment at any time under the health plan indicators (HPI) and/or who had no record of completing three doses of the 5 in 1 vaccine by 12 months was generated. Logistic regression models were used to describe the association between each variable and the risk of admission between those with a history of prior psychiatric admission and those without.

**RESULTS:** Women admitted to an MBU were significantly more likely to be admitted with non-affective psychosis (OR = 1.97, 95%CI 1.22-3.18), affective psychosis (OR = 2.44, 95%CI 1.37-4.33) and non-psychotic depressive episodes (OR = 1.93, 95%CI 1.42-2.63). They were more likely to come from affluent areas (OR: 2.33 95%CI 1.49-3.65). Women with a previous history of psychiatric admission were significantly more likely to be located in the two most deprived quintiles. Almost one third (29%) of children born to mothers with a pregnancy-related psychiatric admission were assessed as "at potential risk of adversity."

**CONCLUSIONS:** A health informatics approach has potential for improving understanding of social and clinical factors, which contribute to the outcomes of perinatal mental illness, as well as potential adverse developmental outcomes for offspring.

**Strengths and limitations of this study**

- Whole of Scotland childbirth and psychiatric admission data used for analyses, rather than local data only.
- Robust measure of socioeconomic status (Scottish Index of Multiple Deprivation) compared with other studies, which have used educational status.
- These analyses used only psychiatric admission data, rather than outpatient psychiatric attendances.
- Our definition of 'at potential risk of adversity' in offspring was a composite and pragmatic measure derived from the limited child health outcome data and there has been some inconsistency in the implementation of this across health boards.



## BACKGROUND:

Good maternal mental health is important for normal childhood development[1]. Maternal mental illness can disrupt optimal parenting processes, and can adversely affect childhood development, especially emotional development[2,3,4]. In particular maternal mental illness may be associated with increased rates of childhood depression[5]and may also affect children’s executive[6] and cognitive functioning[7]. Maternal depression both during pregnancy and in the post-natal period is common and is estimated to affect between 10 and 15% of women[8,9]. While the prevalence of postpartum psychosis is relatively low at 1/1000 births[10], it is known to be associated with severe adverse outcomes, including maternal suicide and infanticide[11].

The joint admission of mentally ill mothers and their infants was pioneered by Thomas Main in 1948[12]. Since then the UK, Australia and France have acted as leaders in this field[13,14]. Currently in the UK where possible, postpartum women (and those in later pregnancy) with severe mental illnesses such as psychosis or severe depressive disorder are admitted to a specialised Mother and Baby Unit (MBU). In the West of Scotland, women in the post-natal period who are the primary carer of their baby and thought to require psychiatric hospital admission are discussed with (and where possible assessed by) the local Consultant Perinatal Psychiatrist. Hospital admission is arranged if required. While most admissions are voluntary, MBUs can also accommodate women who require compulsory treatment under the Mental Health Act. The current Scottish Intercollegiate Guidelines Network (SIGN) clinical guidelines for the management of perinatal mood disorder reflect this[15]. It is recognised that women in the early postpartum period (0 to 6 weeks after childbirth), are at particularly elevated risk of requiring psychiatric admission[16,17]. In our previous study, we found that this risk remains elevated for up to 2 years post childbirth[16].

MBUs are highly specialised, expensive and limited resources, where expertise in both treatment of psychiatric disorders and childcare are required[18]. Although there are currently 15 in England and 2 in Scotland[19],access to this specialised service is poorer in many other High Income Countries (HICs; such as the US and Canada) and Low And Middle Income Countries (LAMICs) despite women appearing to be satisfied with this type of care[20]. Given the importance of adverse childhood experiences (ACEs) in future health[21,22], perinatal mental illness and the potential impact it has on offspring is a priority area for research and practice.

1  
2  
3 AIMS OF THE STUDY:

4 The aim of the study was to use a data linkage approach to investigate factors associated with  
5 admission to a specialist Mother and Baby Unit (MBU) and the impact of perinatal mental illness on  
6 early childhood development of offspring.  
7  
8  
9

10  
11 MATERIALS AND METHODS:

12 We used a dataset from the Information Services Division (ISD) of NHS Scotland, which included all  
13 maternity records (SMR04) between 2005-2009, linked to all psychiatric hospital admission records  
14 (SMR02) between 2003-2011. This dataset has been described elsewhere[16]. However in brief, for  
15 each maternity record, any psychiatric admission was reported by week for the 104 weeks pre-  
16 childbirth and post-childbirth. Admission types were defined by ICD-10 codes: psychosis-only  
17 admissions included 'non-affective psychosis' (F20, F20.3, F20.5, F20.6, F20.8, F20.9, F21X, F22.0,  
18 F22.8, F22.9, F23.0, F23.1, F23.2, F23.3, F23.8, F23.9, F24X, F28X, F29X), 'affective psychosis' (F25.0,  
19 F25.1, F25.2, F25.9, F30.2, F31.2, F31.5, F32.3, F33.3) and 'postpartum psychosis' (F53.0, F53.1,  
20 F53.9); admissions due to a non-psychotic depressive episode included F32.0, F32.00, F32.01, F32.1,  
21 F32.10, F32.11, F32.2, F32.8, F32.9, F33.0, F33.00, F33.1, F33.10, F33.11, F33.2, F33.4, F33.8, F33.9.  
22 For the category of 'other admissions', we included all other ICD-10 codes recorded.  
23  
24  
25  
26  
27  
28  
29  
30  
31

32 In total, 3,290 pregnancy-related psychiatric admissions for 1,730 women were assessed. For  
33 deliveries in 2005, psychiatric admissions between 2003 (two years before) and 2007 (two years  
34 after) were captured. Similarly, for deliveries in 2009, psychiatric admissions from 2007 (two years  
35 before) until 2011 (two years after) were captured. For each maternity record, any psychiatric  
36 admission was reported by week for the 2-year pre-and post-childbirth periods. Early childhood  
37 developmental outcomes (assessed by a Health Visitor at both 10-day and 6-8 week child-health  
38 checks) were also available. All statistical analyses were performed in STATA version 13.1[23].  
39  
40  
41  
42  
43  
44

45 To investigate factors associated with admission to the MBU, we compared the group of mothers  
46 admitted to a MBU unit to those admitted to a general psychiatric ward up to 2 years post-childbirth  
47 on a range of sociodemographic characteristics (age, social deprivation and previous pregnancy). We  
48 included the geographical location (health board area) of the mother. We also compared differences  
49 in average length of stay.  
50  
51  
52  
53  
54

55 To explore possible risk factors associated with previous psychiatric admission in the time period  
56 covered, we compared a group of mothers with a history of prior psychiatric admission to those  
57  
58  
59  
60

1  
2  
3 without a history of admission two or more years prior to the index admission. We compared those  
4 with and without a previous admission by diagnosis, Scottish Index of Multiple Deprivation (SIMD)  
5 quintile, age group, length of stay, time of admission and whether the mother had a previous  
6 pregnancy. SIMD score was used as a measure of social deprivation. The SIMD identifies small areas  
7 of multiple deprivation (datazones) across Scotland by combining 38 indicators across 7 domains  
8 which are weighted. The domains include: current income (28%), employment (28%), health (14%),  
9 education (14%), geographic access to services (9%), crime (5%), and housing (2%) and are weighted  
10 based on evidence from Oxford University's Social Disadvantage Research Centre [24]. Individuals  
11 were divided into deprivation quintiles, depending on their deprivation score based on national  
12 averages.  
13  
14  
15  
16  
17  
18  
19

20  
21 We used logistic regression to describe the association between each variable and the risk of  
22 admission between those with a history of prior psychiatric admission and those without. Odds  
23 ratios were adjusted for age and deprivation quintile or for age only (deprivation quintile) and  
24 deprivation quintile (age only).  
25  
26  
27  
28

29 Finally, to assess the impact of perinatal mental illness on early child development, we generated a  
30 pragmatic indicator for "at potential risk of adversity", defined as a child who was recorded as  
31 requiring intensive treatment at any time under the health plan indicators (HPI) and/or who had no  
32 record of completing three doses of the 5 in 1 vaccine by 12 months. The HPI is assessed at first visit,  
33 at six to eight weeks. For the HPI three possible outcomes can be recorded by the Health Visitor for  
34 the level of care required ('core', 'additional' and 'intensive'). It should be noted that results should  
35 be interpreted cautiously as there has been inconsistency in the implementation of the HPI across  
36 health boards and others have not validated this measure.  
37  
38  
39  
40  
41  
42  
43

#### 44 RESULTS:

45 In total 190 (11.0%) of this sample were admitted to a specialist MBU in Scotland. Table 1 highlights  
46 some important differences between MBU versus non-MBU admissions. Firstly, women admitted to  
47 an MBU were significantly more likely to be admitted with non-affective psychosis (OR = 1.97, 95%CI  
48 1.22-3.18), affective psychosis (OR = 2.44, 95%CI 1.37-4.33) and non-psychotic depressive episodes  
49 (OR = 1.93, 95%CI 1.42-2.63). It is also notable that women admitted to an MBU were significantly  
50 more likely to live within affluent areas (and less likely to come from deprived areas) and in general  
51 more likely to be from an older age group (31-35, 36-40 and over 40) (Table 1). Women admitted to  
52 an MBU were largely from the NHS Greater Glasgow and Clyde Health Board area (54.2% overall).  
53  
54  
55  
56  
57  
58  
59  
60

1  
2  
3  
4  
5  
6  
7  
8  
9  
10  
11  
12  
13  
14  
15  
16  
17  
18  
19  
20  
21  
22  
23  
24  
25  
26  
27  
28  
29  
30  
31  
32  
33  
34  
35  
36  
37  
38  
39  
40  
41  
42  
43  
44  
45  
46  
47  
48  
49  
50  
51  
52  
53  
54  
55  
56  
57  
58  
59  
60

Table 1 also shows that MBU admissions were significantly less likely to have had a previous pregnancy and less likely to have had a previous psychiatric admission. It also highlights important differences in length of stay for MBU versus non-MBU admissions. It shows that women admitted to an MBU were significantly less likely to have brief stays in hospital (of 10 days or less) but significantly more likely to have stays of more than 10 days, and more than twice as likely to have had a stay of 21-40 days or 40 days or more.

In total 562 (32.5%) of the 1,730 women had a history of prior psychiatric admission. Table 2 shows that this group were more likely to be admitted with a diagnosis of affective psychosis (7.3% vs. 2.6%, adjusted OR = 3.00, 95%CI 1.82-4.94) and non-affective psychosis (10.0% vs. 6.4%, adjusted OR = 1.55, 95%CI 1.07-2.25) but less likely to have an admission for a postpartum or non-psychotic depressive episode diagnosis. Those with a previous history of psychiatric admission were also significantly more likely to be located in the two most deprived quintiles and less likely to come from the two most affluent quintiles. Table 2 also shows they were less likely to be under 25 but significantly more likely to be from the 31-35 and 36-40 age groups. No significant differences were identified for length of stay, previous pregnancy or time of admission.

Table 3 shows that 518 (29.9%) of offspring were defined as being “at potential risk of adversity” according to our criteria. Those at “potential risk” were more likely (although not statistically significantly) to have had a mother with non-affective psychosis (OR = 1.37, 95%CI 0.94-2.01) and significantly less likely to have a mother with a diagnosis of non-psychotic depression (OR = 0.65, 95%CI 0.51-0.83). It is notable that they were significantly more likely to come from the most deprived quintiles and less likely to be from more affluent quintiles. No differences were found by age of mother. Those children identified as “at potential risk of adversity” were more likely to have had a mother with a history of a previous psychiatric admission.

#### DISCUSSION:

The aim of this study was to assess the extent to which sociodemographic factors and perinatal mental illness affects treatment and outcomes for both mothers and children. We covered two main areas: admissions to an MBU and factors associated with children identified as at “potential risk of childhood adversity”.

1  
2  
3 In this large Scottish sample, women admitted to an MBU (compared to women admitted to general  
4 psychiatry wards) were significantly more likely be diagnosed with a psychotic illness (non-affective  
5 psychotic illness OR: 1.397 95% CI 1.22-3.18 or affective psychotic illness OR: 2.44 95% CI 1.37-4.33).  
6  
7 This is in keeping with the notion that MBU admission is reserved for women suffering from the  
8 most serious mental disorders[18].  
9  
10

11  
12 Women admitted to an MBU were also more likely to live within affluent areas (and less likely to  
13 come from deprived areas) and in general more likely to be from an older age group (31-35, 36-40  
14 and over 40). It is possible that this might reflect a health inequality in terms of access to MBU  
15 admission but this is a question, which requires further research. To date literature exploring  
16 accessibility to MBUs is limited. There is one systematic review investigating outcomes for women  
17 admitted to a mother and baby unit[25]. Accessibility to an MBU was not reported and no objective  
18 marker of deprivation (such as SIMD) was included[25]. Studies investigating the link between  
19 deprivation and admission rate are limited. Some authors have described a link between psychiatric  
20 diagnoses, deprivation and admission rate[26] while others have suggested a link between socio-  
21 economic status and admission to forensic psychiatry services[27]. However further detailed  
22 investigation in this area is required.  
23  
24  
25  
26  
27  
28  
29  
30  
31

32 In our study we found that women admitted to an MBU were more likely to have a longer average  
33 length of stay (40 plus days OR: 2.48 95% CI 1.65-3.71). This maybe a consequence of a more severe  
34 presentation requiring more intensive support or may be related to the need for a higher level of  
35 social functioning to ensure safe care for mothers and their babies on discharge from hospital.  
36  
37 Further investigation comparing average length of stay in an MBU with particular focus on the cost  
38 effectiveness of MBUs may be warranted.  
39  
40  
41  
42

43 Several notable findings arose from our comparison of mothers of children identified as “at potential  
44 risk of adversity”. Firstly, almost one-third (29%) of children fell into this category. This rate is similar  
45 to that reported by others. For example, Whitmore and colleagues[28] reported that social services  
46 were involved in 31.6% of all admissions to their MBU in Birmingham and 10% of admissions  
47 resulted in separate discharges[28]. Howard and colleagues[29] reported that 23% of women were  
48 discharged with their babies under some form of social services supervision[29].  
49  
50  
51  
52  
53

54 Secondly, our findings indicate that children in the “at potential risk of adversity” group were more  
55 likely to come from deprived locations, have mothers with a previous psychiatric admission and have  
56  
57  
58  
59  
60

1  
2  
3 had a mother admitted with a non-affective psychosis (schizophrenia). This finding is also similar to  
4 that by others [18,28,29] who reported that women with a diagnosis of schizophrenia were  
5 discharged separately more often than other groups. Although Whitmore and colleague [28] did not  
6 report deprivation status, Glangeaud-Freudenthal and colleague [18] and Howard and colleagues  
7 [29] have reported that “low social class” was associated with risk of separation [18,29]. Successful  
8 parenting is complex, but may be partly associated with family stability and access to financial and  
9 social resources [30]. While it is recognised that mothers with severe mental illness, have specific  
10 needs relating to their children, their health and social care needs may not always be readily  
11 identified by healthcare professionals [31]. In cases of separate discharge, additional support should  
12 be made available to minimise distress. Therefore taken together, our findings suggest that there  
13 may be some benefit to identifying mothers at particularly high risk in terms of adverse  
14 developmental outcomes for their children, such as mothers living in more deprived communities  
15 who have a history of previous psychiatric admissions for schizophrenia.  
16  
17  
18  
19  
20  
21  
22  
23

#### 24 25 26 STRENGTHS AND LIMITATIONS:

27 Strengths of this study include the completeness of the sample, which was obtained from record  
28 linkage for the whole of Scotland. However, some limitations in this work are acknowledged. Firstly,  
29 only psychiatric admission data were used, with no use of out-patient data. Our findings are  
30 therefore focused on the more severe end of the mental illness spectrum. Although we were able to  
31 determine if individuals had had a previous psychiatric admission, information about the number of  
32 previous admissions, family support, or access to Crisis teams were not available. The comparisons  
33 of women admitted to MBUs with women admitted to general psychiatric wards needs to be  
34 interpreted cautiously. This is particularly in relation to the timing of admissions in relation to  
35 childbirth, as women will only be admitted to MBUs in the very late stages of pregnancy and in the  
36 first year post-delivery. The general psychiatric admissions included admissions up to 2 years pre  
37 delivery and 2 years post-delivery and may therefore include women with long-term illnesses.  
38  
39  
40  
41  
42  
43  
44  
45

46 Furthermore, limited information about time and length stay at an MBU prevented any cost analysis  
47 being undertaken. Our definition of “at potential risk of adversity” in offspring was a composite and  
48 pragmatic measure derived from the limited child health outcome data which was available to us  
49 from record linkage. There has also been some inconsistency in the implementation of the HPI  
50 across health boards. A more detailed and comprehensive assessment of child development in this  
51 group of mothers is therefore warranted.  
52  
53  
54  
55  
56  
57  
58  
59  
60

## CONCLUSION:

In conclusion, this study found that a health informatics/data linkage approach has considerable potential for improving our understanding of the social and clinical factors, which contribute to perinatal mental illness in mothers in Scotland, as well as potential adverse developmental outcomes for their children. To date there has been no systematic assessment of the benefits (or adverse effects) of specialised MBUs in Scotland. Given the current political-economic climate and the importance of early intervention, further research in this area would be of benefit.

For peer review only

**Table 1. Comparison of characteristics of women admitted either with their infant to a Mother-Baby Unit (MBU) or without their infant to a psychiatric ward (Non-MBU) (N=1729)**

|                                        | MBU admission | Non-MBU admission | Odds ratio, adjusted by age and deprivation (95%CI) |
|----------------------------------------|---------------|-------------------|-----------------------------------------------------|
|                                        | Number (%)    | Number (%)        |                                                     |
| Total                                  | 190 (11.0)    | 1,539 (89)        |                                                     |
| <b>Diagnosis</b>                       |               |                   |                                                     |
| Non affective psychosis                | 24 (12.6)     | 107 (7.0)         | 1.97 (1.22-3.18)                                    |
| Affective psychosis                    | 18 (9.5)      | 53 (3.4)          | 2.44 (1.37-4.33)                                    |
| Post-partum (0-12 weeks) psychosis     | 18 (9.5)      | 87 (5.7)          | 1.56 (0.91-2.70)                                    |
| Non psychotic depressive episodes      | 85 (44.7)     | 447 (29.0)        | 1.93 (1.42-2.63)                                    |
| Any other diagnosis                    | 130 (68.4)    | 1,292 (84.0)      | 0.45 (0.32-0.63)                                    |
| <b>Deprivation Quintile</b>            |               |                   |                                                     |
| Most deprived (1)                      | 64 (33.7)     | 656 (43.4)        | 0.68 (0.49-0.93)                                    |
| 2                                      | 34 (17.9)     | 336 (22.2)        | 0.76 (0.51-1.13)                                    |
| 3                                      | 28 (14.7)     | 246 (16.3)        | 0.88 (0.58-1.31)                                    |
| 4                                      | 37 (19.5)     | 169 (10.2)        | 2.00 (1.35-2.96)                                    |
| Least deprived (5)                     | 27 (14.2)     | 105 (6.9)         | 2.33 (1.49-3.65)                                    |
| <b>Age group</b>                       |               |                   |                                                     |
| Under 20                               | 16 (8.4)      | 172 (11.2)        | 0.78 (0.45-1.34)                                    |
| 20-25                                  | 40 (21.1)     | 465 (30.2)        | 0.65 (0.45-0.95)                                    |
| 26-30                                  | 47 (24.7)     | 407 (26.4)        | 0.90 (0.63-1.29)                                    |
| 31-35                                  | 50 (26.3)     | 293 (19.0)        | 1.38 (0.97-1.96)                                    |
| 36-40                                  | 31 (16.3)     | 170 (11.0)        | 1.49 (1.03-1.58)                                    |
| Over40                                 | 6 (3.2)       | 32 (2.1)          | 1.55 (0.63-3.80)                                    |
| <b>Length of admission</b>             |               |                   |                                                     |
| Five days or less                      | 35 (18.4)     | 640 (41.6)        | 0.34 (0.23-0.50)                                    |
| 6-10 days                              | 25 (13.2)     | 320 (20.8)        | 0.59 (0.39-0.92)                                    |
| 11-20 days                             | 42 (22.1)     | 274 (17.8)        | 1.27 (0.86-1.85)                                    |
| 21-40 days                             | 49 (25.8)     | 172 (11.2)        | 2.51 (1.73-3.63)                                    |
| 40 plus days                           | 39 (20.4)     | 133 (8.6)         | 2.48 (1.65-3.71)                                    |
| <b>Geographical Location</b>           |               |                   |                                                     |
| Greater Glasgow and Clyde              | 103 (54.2)    | 389 (25.3)        | 3.50 (2.57-4.76)                                    |
| Lothian                                | 55 (29.0)     | 169 (11.0)        | 3.30 (2.32-4.96)                                    |
| Lanarkshire                            | 12 (6.3)      | 169 (11.0)        | 0.54 (0.29-1.00)                                    |
| Any other Health Board                 | 20 (10.5)     | 812 (52.7)        | 0.02 (0.01 to 0.03)                                 |
| Had previous pregnancy                 | 95 (50.0)     | 935 (60.8)        | 0.57 (0.41-0.78)                                    |
| History of prior psychiatric admission | 43 (22.6)     | 519 (33.7)        | 0.57 (0.40-0.83)                                    |
| <b>Time of first admission</b>         |               |                   |                                                     |
| Post-partum (0-12-weeks)               | 102 (53.7)    | 125 (8.1)         | 11.96 (8.4-16.8)                                    |

*Note: women could have more than one diagnosis so numbers are greater than the number of women. In total 27 women had no Scottish Index of Multiple Deprivation (SIMD) quintile assigned due to missing or incorrect postcode and were excluded from the regression analysis for all variables*



**Table 2. Comparison of characteristics of women with and without a previous psychiatric admission prior to the index admission (N=1720).**

|                                   | Previous admission  | No previous admission | Odds ratio adjusted by age and deprivation (95%CI) |
|-----------------------------------|---------------------|-----------------------|----------------------------------------------------|
|                                   | Number (% of total) | Number (% of total)   |                                                    |
| Total                             | 562 (32.5)          | 1,168 (67.5)          |                                                    |
| <b>Diagnosis</b>                  |                     |                       |                                                    |
| Non affective psychosis           | 56 (10.0)           | 75 (6.4)              | 1.55 (1.07-2.25)                                   |
| Affective psychosis               | 41 (7.3)            | 30 (2.6)              | 3.00 (1.82-4.94)                                   |
| Post-partum psychosis             | 57 (10.1)           | 170 (14.6)            | 0.36 (0.20-0.64)                                   |
| Non psychotic depressive episodes | 137 (24.4)          | 395 (33.8)            | 0.63 (0.50-0.79)                                   |
| Any other diagnosis               | 450 (80.1)          | 973 (83.3)            | 0.78 (0.60-1.02)                                   |
| <b>Deprivation Quintile</b>       |                     |                       |                                                    |
| Most deprived                     | 251 (45.7)          | 470 (40.7)            | 1.31 (1.07-1.61)                                   |
| 2                                 | 131 (23.9)          | 239 (20.7)            | 1.11 (0.87-1.42)                                   |
| 3                                 | 85 (15.5)           | 189 (16.4)            | 0.90 (0.68-1.20)                                   |
| 4                                 | 54 (9.8)            | 152 (13.2)            | 0.68 (0.49-0.95)                                   |
| Least deprived                    | 28 (5.1)            | 104 (9.0)             | 0.48 (0.31-0.75)                                   |
| <b>Age group</b>                  |                     |                       |                                                    |
| Under 20                          | 37 (6.6)            | 152 (13.0)            | 0.44 (0.30-0.64)                                   |
| 20-25                             | 146 (26.0)          | 359 (30.7)            | 0.78 (0.62-0.98)                                   |
| 26-30                             | 160 (28.5)          | 294 (25.2)            | 1.19 (0.95-1.50)                                   |
| 31-35                             | 126 (22.4)          | 217 (18.6)            | 1.31 (1.01-1.68)                                   |
| 36-40                             | 80 (14.2)           | 121 (10.4)            | 1.45 (1.07-1.97)                                   |
| Over40                            | 13 (2.3)            | 25 (2.1)              | 1.01 (0.50-2.03)                                   |
| <b>Length of stay</b>             |                     |                       |                                                    |
| Five days or less                 | 203 (36.1)          | 472 (40.4)            | 0.87 (0.70-1.09)                                   |
| 6-10 days                         | 112 (19.9)          | 234 (20.0)            | 0.99 (0.76-1.28)                                   |
| 11-20 days                        | 104 (18.5)          | 212 (18.2)            | 0.95 (0.73-1.24)                                   |
| 21-40 days                        | 71 (12.6)           | 150 (12.8)            | 0.99 (0.73-1.26)                                   |
| 40 plus days                      | 72 (12.8)           | 100 (8.6)             | 1.50 (1.07-2.09)                                   |
| Had previous pregnancy            | 359 (63.9)          | 671 (57.5)            | 1.03 (0.82-1.29)                                   |
| Time of first admission           |                     |                       |                                                    |
| Post-partum (0-12-weeks)          | 57 (10.1)           | 170 (14.6)            | 0.71 (0.48-1.02)                                   |

Note: women could have more than one diagnosis so numbers are greater than the number of women. In total 27 women had no Scottish Index of Multiple Deprivation (SIMD) quintile assigned due to missing or incorrect postcode and were excluded from the regression analysis for all variables

**Table 3. Characteristics of mothers with children defined as being at 'potential risk of adversity' (N=1720)**

|                                        | <b>At potential risk of adversity</b> | <b>Not at potential risk of adversity</b> | <b>Odds ratio adjusted by age and deprivation (95%CI)</b> |
|----------------------------------------|---------------------------------------|-------------------------------------------|-----------------------------------------------------------|
|                                        | Number (% of total)                   | Number (% of total)                       |                                                           |
| <b>Total</b>                           | 518 (29.9)                            | 1,212 (70.1)                              |                                                           |
| MBU Stay                               | 58 (30.4)                             | 133 (69.6)                                | 1.18 (0.84-1.65)                                          |
| General Ward                           | 459 (29.8)                            | 1,079 (70.2)                              | 1                                                         |
| <b>Diagnosis</b>                       |                                       |                                           |                                                           |
| Non affective psychosis                | 49 (9.5)                              | 82 (6.7)                                  | 1.37 (0.94-2.01)                                          |
| Affective psychosis                    | 22 (4.3)                              | 49 (4.0)                                  | 1.24 (0.73-2.12)                                          |
| Post-partum psychosis                  | 21 (4.1)                              | 84 (6.9)                                  | 0.62 (0.37-1.03)                                          |
| Non psychotic depressive episodes      | 127 (24.5)                            | 405 (33.4)                                | 0.65 (0.51-0.83)                                          |
| Any other diagnosis                    | 426 (82.2)                            | 997 (82.3)                                | 0.93 (0.70-1.22)                                          |
| <b>Deprivation Quintile</b>            |                                       |                                           |                                                           |
| Most deprived                          | 274 (54.0)                            | 448 (37.5)                                | 1.88 (1.52-2.32)                                          |
| 2                                      | 112 (22.1)                            | 227 (21.5)                                | 1.03 (0.80-1.33)                                          |
| 3                                      | 61 (12.0)                             | 214 (17.9)                                | 0.61 (0.45-0.84)                                          |
| 4                                      | 36 (7.1)                              | 169 (14.1)                                | 0.46 (0.32-0.68)                                          |
| <b>Least deprived</b>                  | 24 (7.3)                              | 108 (9.3)                                 | 0.51 (0.32-0.81)                                          |
| <b>Age group</b>                       |                                       |                                           |                                                           |
| Under 20                               | 61 (11.8)                             | 128 (10.6)                                | 1.02 (0.73-1.45)                                          |
| 20-25                                  | 154 (29.7)                            | 351 (29.0)                                | 0.91 (0.72-1.15)                                          |
| 26-30                                  | 154 (29.7)                            | 300 (24.8)                                | 1.32 (0.98-1.67)                                          |
| 31-35                                  | 90 (17.4)                             | 253 (20.9)                                | 0.90 (0.69-1.17)                                          |
| 36-40                                  | 47 (9.1)                              | 154 (12.7)                                | 0.73 (0.51-1.03)                                          |
| Over40                                 | 12 (2.3)                              | 26 (2.2)                                  | 1.15 (0.56-2.33)                                          |
| <b>Length of stay</b>                  |                                       |                                           |                                                           |
| Five days or less                      | 213 (41.1)                            | 456 (37.6)                                | 1.16 (0.93-1.44)                                          |
| 6-10 days                              | 103 (19.9)                            | 244 (20.1)                                | 0.91 (0.70-1.19)                                          |
| 11-20 days                             | 93 (18.0)                             | 223 (18.4)                                | 0.98 (0.73-1.29)                                          |
| 21-40 days                             | 48 (11.2)                             | 166 (13.7)                                | 0.84 (0.60-1.17)                                          |
| 40 plus days                           | 51 (9.9)                              | 123 (10.2)                                | 0.98 (0.68-1.40)                                          |
| Had previous pregnancy                 | 319 (61.6)                            | 711 (58.9)                                | 1.11 (0.89-1.40)                                          |
| History of prior psychiatric admission | 215 (41.5)                            | 347 (28.6)                                | 1.76 (1.41-2.21)                                          |
| <b>Time of first admission</b>         |                                       |                                           |                                                           |
| Post-partum (0-12-weeks)               | 73 (14.1)                             | 154 (12.7)                                | 1.31 (0.96-1.79)                                          |

Note: women could have more than one diagnosis so numbers are greater than the number of women. In total 27 women had no Scottish Index of Multiple Deprivation (SIMD) quintile assigned due to missing or incorrect postcode and were excluded from the regression analysis for all variables  
 Note: "at potential risk of adversity", is defined as a child who was recorded as requiring intensive treatment at any time under the health plan indicators (HPI) and/or who had no record of completing three doses of the 5 in 1 vaccine by 12 months. HPI is assessed at first visit and at six to eight weeks.

1  
2  
3 Contributor ship statement:

4 GM undertook the data analyses. JLM and DJM wrote the initial draft of the paper. GM, RC and DJM  
5 were involved in the drafting of the paper  
6  
7

8 Competing interests:

9 All authors report no competing interests.  
10  
11

12 Funding:

13 This project was funded by a CSO Health Informatics Call Grant  
14  
15

16 Data sharing statement:

17 Data included in the study are available to the authors only  
18  
19  
20  
21  
22  
23  
24  
25  
26  
27  
28  
29  
30  
31  
32  
33  
34  
35  
36  
37  
38  
39  
40  
41  
42  
43  
44  
45  
46  
47  
48  
49  
50  
51  
52  
53  
54  
55  
56  
57  
58  
59  
60

## REFERENCES:

- 1 Stein A, Pearson RM, Goodman SH, Rapa E, Rahman A, McCallum M, Howard LM, Pariante CMEffects of perinatal mental disorders on the fetus and child. *Lancet*. 2014 Nov 15;384(9956):1800-19. doi: 10.1016/S0140-6736(14)61277-0. Epub 2014 Nov 14.
- 2 Milgrom J, Ericksen J, Sved-Williams A. Chapter Impact of Parental Psychiatric Illness on Infant Development in Sutter-Dallay A-L, Glangeaud-Freudenthal NM-C, Guedeney A, Riecher-Rössler A (eds) *Joint care of parents and infants in perinatal psychiatry*. 2016, Springer,47-78.
- 3 Leis JA, Heron J, Stuart EA, Mendelson T. Associations between maternal mental health and child emotional and behavioral problems: does prenatal mental health matter? *J Abnorm Child Psychol* 2013; 42: 161–71
- 4 Yarrow L.J., MacTurk R.H., Vietze P.M., McCarthy M.E., Klein R.P., McQuinston S. Development course of parental stimulation and its relationship to mastery motivation during infancy. *Developmental Psychology*. 1984;20:492–503.
- 5 Murray L., Halligan S.L., & Cooper P.J. Effects of postnatal depression on mother-infant interactions, and child development In Wachs B.G., editor. (Ed.), 2010 *Handbook of infant development* (pp. 192–220). Malden: Wiley-Blackwell.
- 6 Hughes C, Roman G, Hart MJ, Ensor R. Does maternal depression predict young children's executive function? - a 4-year longitudinal study. *J Child Psychol Psychiatry*. 2013 Feb;54(2):169-77. doi: 10.1111/jcpp.12014. Epub 2012 Nov
- 7 Sutter-Dallay AL, Murray L, Dequae-Merchadou L, Glatigny-Dallay E, Bourgeois ML, Verdoux H.A prospective longitudinal study of the impact of early postnatal vs. chronic maternal depressive symptoms on child development. *Eur Psychiatry*. 2011 Nov;26(8):484-9. doi: 10.1016/j.eurpsy.2010.05.004. Epub 2010 Jul 10
- 8 O'Hara MW, Swain AM Rates and risk of postpartum depression: a meta-analysis *Int Rev Psychiatry*, 1996, 8 :37–54
- 9 Pearlstein T, Howard M, Salisbury A, Zlotnick C. Postpartum depression *Am J Obstet Gynecol*, 2009. 200: 357–364
- 10 Terp IM, Mortensen PB. Post-partum psychoses. Clinical diagnoses and relative risk of admission after parturition. *Br J Psychiatry* 1998;172:521–6.
- 11 Wisner KL, Peindl K, Hanusa BH. Symptomatology of affective and psychotic illnesses related to childbearing. *J Affect Disord* 1994;30:77–87. doi:10.1016/0165-0327(94)90034-5
- 12 Brockington IF. Oxford: Oxford University Press; 1996. *Motherhood and Mental Health*
- 13 Brockington I, Butterworth R, Glangeaud-Freudenthal N. An international position paper on mother-infant (perinatal) mental health, with guidelines for clinical practice. *Archives of Women's Mental Health*. 2017;20(1):113-120. doi:10.1007/s00737-016-0684-7.

1  
2  
3 14 Cazas O, Glangeaud-Freudenthal NM-C. The history of Mother-Baby Units (MBUs) in France and  
4 Belgium and of the French version of the Marcé checklist. *Archives of Women's Mental Health*.  
5 2004;7(1):53-58. doi:10.1007/s00737-003-0046-0.  
6

7 15 SIGN 127 Management of perinatal mood disorders Available at:  
8 <http://www.sign.ac.uk/pdf/sign127.pdf> Accessed 01/03/2017  
9

10  
11 16 Langan-Martin, J., McLean, G., Cantwell, R., and Smith, D. J. Admission to psychiatric hospital in  
12 the early and late post-partum periods: Scottish national linkage study. *BMJ Open*, 2016 6(1),  
13 e008758. (doi:10.1136/bmjopen-2015-008758)(MID:26733566)  
14

15 17 Munk-Olsen T, Laursen TM, Pedersen CB et al New parents and mental disorders: a population-  
16 based registered study. *JAMA* 2006 296:2582–2589  
17

18  
19 18 Glangeaud-Freudenthal NM, Howard LM, Sutter-Dallay AL. Treatment - mother-infant inpatient  
20 units. *Best Pract Res Clin Obstet Gynaecol*. 2014 Jan;28(1):147-57. doi:  
21 10.1016/j.bpobgyn.2013.08.015. Epub 2013 Sep 3.  
22

23  
24 19 Royal College of Psychiatrists Quality Network for Perinatal Mental Health Services  
25 (2016). <http://www.rcpsych.ac.uk/pdf/Annual%20Inpatient%20Report%20Final%20Draft.pdf>  
26 Accessed 16/03/2017  
27

28 20 Neil S, Sanderson H, Wieck A (2006) A satisfaction survey of women admitted to a psychiatric  
29 mother and baby unit in the northwest of England. *Arch Womens Ment Health* 2006: 9:109–112.  
30

31 21 Bellis MA, Hughes K, Leckenby N, Hardcastle KA, Perkins C, Lowey H. Measuring mortality and the  
32 burden of adult disease associated with adverse childhood experiences in England: a national survey.  
33 *J Public Health (Oxf)*. 2015; 37(3):445-54. doi: 10.1093/pubmed/fdu065. Epub 2014 Aug 30.  
34

35  
36 22 Felitti VJ, Anda RF, Nordenberg D, Williamson DF, Spitz AM, Edwards V, Koss MP, Marks JS.  
37 Relationship of childhood abuse and household dysfunction to many of the leading causes of death  
38 in adults. The Adverse Childhood Experiences Study. *Am J Prev Med*. 1998;14:245–258  
39

40 23 STATA: <https://www.stata.com/stata-news/news28-4/stata13.1/>  
41

42 24 SIMD Scotland [http://simd.scotland.gov.uk/publication-2012/introduction-to-simd-](http://simd.scotland.gov.uk/publication-2012/introduction-to-simd-2012/overview-of-the-simd/what-is-the-simd/)  
43 [2012/overview-of-the-simd/what-is-the-simd/](http://simd.scotland.gov.uk/publication-2012/introduction-to-simd-2012/overview-of-the-simd/what-is-the-simd/) Accessed 09/05/2017  
44

45 25 Gillham R, Wittkowski A. Outcomes for women admitted to a mother and baby unit: a systematic  
46 review. *International Journal of Women's Health*. 2015;7:459-476. doi:10.2147/IJWH.S69472.  
47

48  
49 26 Harrison J, Barrow S, Creed F. Social deprivation and psychiatric admission rates among different  
50 diagnostic groups. *Br J Psychiatry*. 1995 Oct;167(4):456-62.  
51

52 27 Coid J, Kahtan N, Cook A, Gault S, Jarman B. Predicting admission rates to secure forensic  
53 psychiatry services. *Psychol Med*. 2001 Apr;31(3):531-9.  
54

55 28 Whitmore J, Heron J, Wainscott G. Predictors of parenting concern in a Mother and Baby Unit over  
56 a 10-year period. *Int J Soc Psychiatry*. 2011 Sep;57(5):455-61. doi: 10.1177/0020764010365412.  
57 Epub 2010 Apr 13.  
58  
59  
60

1  
2  
3  
4 29 Howard LM, Thornicroft G, Salmon M, Appleby L Predictors of parenting outcome in women with  
5 psychotic disorders discharged from mother and baby units. *Acta Psychiatr Scand*. 2004  
6 Nov;110(5):347-55.  
7

8 30 Abel KM, Webb RT, Salmon MP, Wan MW, Appleby L. Prevalence and predictors of parenting  
9 outcomes in a cohort of mothers with schizophrenia admitted for joint mother and baby psychiatric  
10 care in England. *J Clin Psychiatry* 2005; 66:781–789.  
11

12 31 Howard LM, Hunt K The needs of mothers with severe mental illness: a comparison of  
13 assessments of needs by staff and patients. *Arch Womens Ment Health* 2008; 11:131–136.  
14  
15  
16  
17  
18  
19  
20  
21  
22  
23  
24  
25  
26  
27  
28  
29  
30  
31  
32  
33  
34  
35  
36  
37  
38  
39  
40  
41  
42  
43  
44  
45  
46  
47  
48  
49  
50  
51  
52  
53  
54  
55  
56  
57  
58  
59  
60

For peer review only

## STROBE Statement—checklist of items that should be included in reports of observational studies

|                              | Item No | Page Number discussed                                                                                                                                                                                                                                                                                                   |
|------------------------------|---------|-------------------------------------------------------------------------------------------------------------------------------------------------------------------------------------------------------------------------------------------------------------------------------------------------------------------------|
| <b>Title and abstract</b>    | 1       | (a) Page 1<br>(b) Page 2                                                                                                                                                                                                                                                                                                |
| <b>Introduction</b>          |         |                                                                                                                                                                                                                                                                                                                         |
| Background/rationale         | 2       | Page 4                                                                                                                                                                                                                                                                                                                  |
| Objectives                   | 3       | Page 4                                                                                                                                                                                                                                                                                                                  |
| <b>Methods</b>               |         |                                                                                                                                                                                                                                                                                                                         |
| Study design                 | 4       | Page 5                                                                                                                                                                                                                                                                                                                  |
| Setting                      | 5       | Page 5                                                                                                                                                                                                                                                                                                                  |
| Participants                 | 6       | (a) <i>Cross-sectional study</i> —Page 5<br>(b) <i>No matching</i>                                                                                                                                                                                                                                                      |
| Variables                    | 7       | Page 5                                                                                                                                                                                                                                                                                                                  |
| Data sources/<br>measurement | 8*      | Page 5                                                                                                                                                                                                                                                                                                                  |
| Bias                         | 9       | Page 9                                                                                                                                                                                                                                                                                                                  |
| Study size                   | 10      | Page 5                                                                                                                                                                                                                                                                                                                  |
| Quantitative variables       | 11      | Page 5                                                                                                                                                                                                                                                                                                                  |
| Statistical methods          | 12      | (a) Page 5<br>(b) Describe any methods used to examine subgroups and interactions Page 5<br>(c) Explain how missing data were addressed Page 5<br>(d) <i>Cross-sectional study</i> —If applicable, describe analytical methods taking account of sampling strategy Page 5<br>(e) Describe any sensitivity analyses: n/a |

Continued on next page

**Results**

|                  |     |                                                                                                                                                                                                                                                                                                              |
|------------------|-----|--------------------------------------------------------------------------------------------------------------------------------------------------------------------------------------------------------------------------------------------------------------------------------------------------------------|
| Participants     | 13* | (a) Page 5<br>(b) n/a<br>(c) N/a                                                                                                                                                                                                                                                                             |
| Descriptive data | 14* | (a) Page 6<br>(b) n/a<br>(c) <i>Cohort study</i> —Summarise follow-up time (eg, average and total amount) n/a                                                                                                                                                                                                |
| Outcome data     | 15* | <i>Cohort study</i> —Report numbers of outcome events or summary measures over time<br><i>Case-control study</i> —Report numbers in each exposure category, or summary measures of exposure<br><i>Cross-sectional study</i> —Report numbers of outcome events or summary measures Pages 6 and 7 & Tables 1-4 |
| Main results     | 16  | (a) Pages 6 and 7 & Tables 1-4<br>(b) Report category boundaries when continuous variables were categorized n/a<br>(c) If relevant, consider translating estimates of relative risk into absolute risk for a meaningful time period – n/a                                                                    |
| Other analyses   | 17  | Report other analyses done—eg analyses of subgroups and interactions, and sensitivity analyses Pages 6 and 7 & Tables 1-4                                                                                                                                                                                    |

**Discussion**

|                  |    |                                                                                                                                                                                      |
|------------------|----|--------------------------------------------------------------------------------------------------------------------------------------------------------------------------------------|
| Key results      | 18 | Summarise key results with reference to study objectives Page 7                                                                                                                      |
| Limitations      | 19 | Discuss limitations of the study, taking into account sources of potential bias or imprecision. Discuss both direction and magnitude of any potential bias Pages 3 and 9             |
| Interpretation   | 20 | Give a cautious overall interpretation of results considering objectives, limitations, multiplicity of analyses, results from similar studies, and other relevant evidence Pages 7-9 |
| Generalisability | 21 | Discuss the generalisability (external validity) of the study results pages 7-9                                                                                                      |

**Other information**

|         |    |                                                                                                                                                                       |
|---------|----|-----------------------------------------------------------------------------------------------------------------------------------------------------------------------|
| Funding | 22 | Give the source of funding and the role of the funders for the present study and, if applicable, for the original study on which the present article is based page 14 |
|---------|----|-----------------------------------------------------------------------------------------------------------------------------------------------------------------------|



# BMJ Open

## Admission to Psychiatric Hospital for mental illnesses 2 years pre and post childbirth in Scotland: a health informatics approach to assessing mother and child outcomes.

|                                 |                                                                                                                                                                                                                                                                                                                                                                                |
|---------------------------------|--------------------------------------------------------------------------------------------------------------------------------------------------------------------------------------------------------------------------------------------------------------------------------------------------------------------------------------------------------------------------------|
| Journal:                        | <i>BMJ Open</i>                                                                                                                                                                                                                                                                                                                                                                |
| Manuscript ID                   | bmjopen-2017-016908.R2                                                                                                                                                                                                                                                                                                                                                         |
| Article Type:                   | Research                                                                                                                                                                                                                                                                                                                                                                       |
| Date Submitted by the Author:   | 07-Jul-2017                                                                                                                                                                                                                                                                                                                                                                    |
| Complete List of Authors:       | Langan, Julie; University of Glasgow, Institute of Health and Wellbeing<br>McLean, Gary; University of Glasgow, Institute of Health and Wellbeing<br>Martin, Daniel; Glasgow University, Institute of Health and Wellbeing<br>Cantwell, Roch; Leverndale Hospital, Perinatal Mental Health Services<br>Smith, Daniel; University of Glasgow, Institute of Health and Wellbeing |
| <b>Primary Subject Heading</b>: | Mental health                                                                                                                                                                                                                                                                                                                                                                  |
| Secondary Subject Heading:      | Health informatics, Health services research, Public health                                                                                                                                                                                                                                                                                                                    |
| Keywords:                       | mental illness, child outcomes, Mother and Baby Unit, psychiatric admissions                                                                                                                                                                                                                                                                                                   |
|                                 |                                                                                                                                                                                                                                                                                                                                                                                |

SCHOLARONE™  
Manuscripts

1  
2  
3 **Admission to Psychiatric Hospital for mental illnesses 2 years pre and post childbirth in Scotland: a**  
4 **health informatics approach to assessing mother and child outcomes.**  
5

6 Julie Langan Martin<sup>1</sup>, Gary McLean<sup>1</sup>, Daniel Martin<sup>1</sup>, Roch Cantwell<sup>2</sup>, Daniel J. Smith<sup>1</sup>.  
7

8 <sup>1</sup>Institute of Health and Wellbeing, College of Medical, Veterinary and Life Sciences, University of  
9 Glasgow, Mental Health and Wellbeing, Gartnavel Royal Hospital, 1055 Great Western Road,  
10 Glasgow G12 0XH  
11

12 <sup>2</sup>Perinatal Mental Health Service & West of Scotland Mother & Baby Unit, Leverndale Hospital, 510  
13 Crookston Road, Glasgow G53 7TU  
14

15  
16 Corresponding Author Julie Langan Martin Institute of Health and Wellbeing, College of Medical,  
17 Veterinary and Life Sciences, University of Glasgow, Mental Health and Wellbeing, Gartnavel Royal  
18 Hospital, 1055 Great Western Road, Glasgow G12 0XH Phone No: +44 (0)141 211 3927 Fax :+44 (0)  
19 141 211 0356  
20

21 Email: Julie.langan@glasgow.ac.uk  
22  
23

24 **KEYWORDS: mental illness, child outcomes, Mother and Baby Unit and hospital admission**  
25

26  
27 **WORD COUNT: ABSTRACT: 300 MAIN TEXT: 2755**  
28  
29  
30  
31  
32  
33  
34  
35  
36  
37  
38  
39  
40  
41  
42  
43  
44  
45  
46  
47  
48  
49  
50  
51  
52  
53  
54  
55  
56  
57  
58  
59  
60

**ABSTRACT**

**OBJECTIVE:** To identify factors associated with: admission to a specialist Mother and Baby Unit (MBU), and the impact of perinatal mental illness on early childhood development using a data linkage approach in the 2 years pre and post childbirth.

**METHODS:** Scottish maternity records (SMR02) were linked to psychiatric hospital admissions (SMR04). 3,290 pregnancy-related psychiatric admissions for 1,730 women were assessed. To investigate factors associated with MBU admission, the group of mothers admitted to a MBU were compared to those admitted to general psychiatric wards. To assess the impact of perinatal mental illness on early child development, a pragmatic indicator for 'at potential risk of adversity', defined as a child who was recorded as requiring intensive treatment at any time under the health plan indicators (HPI) and/or who had no record of completing three doses of the 5 in 1 vaccine by 12 months was generated. Logistic regression models were used to describe the association between each variable and the risk of admission between those with a history of prior psychiatric admission and those without.

**RESULTS:** Women admitted to an MBU were significantly more likely to be admitted with non-affective psychosis (OR = 1.97, 95%CI 1.22-3.18), affective psychosis (OR = 2.44, 95%CI 1.37-4.33) and non-psychotic depressive episodes (OR = 1.93, 95%CI 1.42-2.63). They were less likely to come from deprived areas (OR: 0.68 95%CI 0.49-0.93). Women with a previous history of psychiatric admission were significantly more likely to be located in the two most deprived quintiles. Almost one third (29%) of children born to mothers with a pregnancy-related psychiatric admission were assessed as "at potential risk of adversity."

**CONCLUSIONS:** A health informatics approach has potential for improving understanding of social and clinical factors, which contribute to the outcomes of perinatal mental illness, as well as potential adverse developmental outcomes for offspring.

**Strengths and limitations of this study**

- Whole of Scotland childbirth and psychiatric admission data used for analyses, rather than local data only.
- Robust measure of socioeconomic status (Scottish Index of Multiple Deprivation) compared with other studies, which have used educational status.
- These analyses used only psychiatric admission data, rather than outpatient psychiatric attendances.
- Our definition of 'at potential risk of adversity' in offspring was a composite and pragmatic measure derived from the limited child health outcome data and there has been some inconsistency in the implementation of this across health boards.

1  
2  
3  
4 BACKGROUND:

5  
6 Good maternal mental health is important for normal childhood development[1]. Maternal mental  
7 illness can disrupt optimal parenting processes, and can adversely affect childhood development,  
8 especially emotional development[2,3,4]. In particular maternal mental illness may be associated  
9 with increased rates of childhood depression[5]and may also affect children’s executive[6] and  
10 cognitive functioning[7]. Maternal depression both during pregnancy and in the post-natal period is  
11 common and is estimated to affect between 10 and 15% of women[8,9]. While the prevalence of  
12 postpartum psychosis is relatively low at 1/1000 births[10], it is known to be associated with severe  
13 adverse outcomes, including maternal suicide and infanticide[11].  
14  
15  
16  
17  
18  
19

20  
21 The joint admission of mentally ill mothers and their infants was pioneered by Thomas Main in  
22 1948[12]. Since then the UK, Australia and France have acted as leaders in this field[13,14]. Currently  
23 in the UK where possible, postpartum women (and those in later pregnancy) with severe mental  
24 illnesses such as psychosis or severe depressive disorder are admitted to a specialised Mother and  
25 Baby Unit (MBU). In the West of Scotland, women in the post-natal period who are the primary carer  
26 of their baby and thought to require psychiatric hospital admission are discussed with (and where  
27 possible assessed by) the local Consultant Perinatal Psychiatrist. Hospital admission is arranged if  
28 required. While most admissions are voluntary, MBUs can also accommodate women who require  
29 compulsory treatment under the Mental Health Act. The current Scottish Intercollegiate Guidelines  
30 Network (SIGN) clinical guidelines for the management of perinatal mood disorder reflect this[15]. It  
31 is recognised that women in the early postpartum period (0 to 6 weeks after childbirth), are at  
32 particularly elevated risk of requiring psychiatric admission[16,17]. In our previous study, we found  
33 that this risk remains elevated for up to 2 years post childbirth[16].  
34  
35  
36  
37  
38  
39  
40  
41  
42

43 MBUs are highly specialised, expensive and limited resources, where expertise in both treatment of  
44 psychiatric disorders and childcare are required[18]. Although there are currently 15 in England and  
45 2 in Scotland[19],access to this specialised service is poorer in many other High Income Countries  
46 (HICs; such as the US and Canada) and Low And Middle Income Countries (LAMICs) despite women  
47 appearing to be satisfied with this type of care[20]. Given the importance of adverse childhood  
48 experiences (ACEs) in future health[21,22], perinatal mental illness and the potential impact it has  
49 on offspring is a priority area for research and practice.  
50  
51  
52  
53  
54

55  
56 AIMS OF THE STUDY:  
57  
58  
59  
60

1  
2  
3 The aim of the study was to use a data linkage approach to investigate factors associated with  
4 admission to a specialist Mother and Baby Unit (MBU) and the risk to early childhood development  
5 in the context of a pregnancy related psychiatric admission.  
6  
7

#### 8 9 MATERIALS AND METHODS:

10 We used a dataset from the Information Services Division (ISD) of NHS Scotland, which included all  
11 maternity records (SMR04) between 2005-2009, linked to all psychiatric hospital admission records  
12 (SMR02) between 2003-2011. This dataset has been described elsewhere[16]. However in brief, for  
13 each maternity record, any psychiatric admission was reported by week for the 104 weeks pre-  
14 childbirth and post-childbirth. Admission types were defined by ICD-10 codes: psychosis-only  
15 admissions included 'non-affective psychosis' (F20, F20.3, F20.5, F20.6, F20.8, F20.9, F21X, F22.0,  
16 F22.8, F22.9, F23.0, F23.1, F23.2, F23.3, F23.8, F23.9, F24X, F28X, F29X), 'affective psychosis' (F25.0,  
17 F25.1, F25.2, F25.9, F30.2, F31.2, F31.5, F32.3, F33.3) and 'postpartum psychosis' (F53.0, F53.1,  
18 F53.9); admissions due to a non-psychotic depressive episode included F32.0, F32.00, F32.01, F32.1,  
19 F32.10, F32.11, F32.2, F32.8, F32.9, F33.0, F33.00, F33.1, F33.10, F33.11, F33.2, F33.4, F33.8, F33.9.  
20 For the category of 'other admissions', we included all other ICD-10 codes recorded.  
21  
22  
23  
24  
25  
26  
27  
28  
29

30 In total, 3,290 pregnancy-related psychiatric admissions for 1,730 women were assessed. For  
31 deliveries in 2005, psychiatric admissions between 2003 (two years before) and 2007 (two years  
32 after) were captured. Similarly, for deliveries in 2009, psychiatric admissions from 2007 (two years  
33 before) until 2011 (two years after) were captured. For each maternity record, any psychiatric  
34 admission was reported by week for the 2-year pre-and post-childbirth periods. Early childhood  
35 developmental outcomes (assessed by a Health Visitor at both 10-day and 6-8 week child-health  
36 checks) were also available. All statistical analyses were performed in STATA version 13.1[23].  
37  
38  
39  
40  
41  
42

43 To investigate factors associated with admission to the MBU, we compared the group of mothers  
44 admitted to one of two Scottish MBU units to those admitted to a general psychiatric ward up to 2  
45 years post-childbirth on a range of sociodemographic characteristics (age, social deprivation and  
46 previous pregnancy). We included the geographical location (health board area) of the mother. We  
47 also compared differences in average length of stay. There are two MBUs in Scotland, the West of  
48 Scotland Mother and baby Unit (Leverndale Hospital, NHS Greater Glasgow and Clyde) and Mental  
49 Health Mother and Baby Unit, St John's Hospital, (West Lothian) where mothers are admitted with  
50 their baby in the post-partum period. For women admitted to a general psychiatric hospital this is  
51 generally without their baby.  
52  
53  
54  
55  
56  
57  
58  
59  
60

1  
2  
3  
4  
5 To explore possible risk factors associated with previous psychiatric admission in the time period  
6 covered, we compared a group of mothers with a history of prior psychiatric admission to those  
7 without a history of admission two or more years prior to the index admission. We compared those  
8 with and without a previous admission by diagnosis, Scottish Index of Multiple Deprivation (SIMD)  
9 quintile, age group, length of stay, time of admission and whether the mother had a previous  
10 pregnancy. SIMD score was used as a measure of social deprivation. The SIMD identifies small areas  
11 of multiple deprivation (datazones) across Scotland by combining 38 indicators across 7 domains  
12 which are weighted. The domains include: current income (28%), employment (28%), health (14%),  
13 education (14%), geographic access to services (9%), crime (5%), and housing (2%) and are weighted  
14 based on evidence from Oxford University's Social Disadvantage Research Centre [24]. Individuals  
15 were divided into deprivation quintiles, depending on their deprivation score based on national  
16 averages.  
17  
18  
19  
20  
21  
22  
23  
24

25  
26 We used logistic regression to describe the association between each variable and the risk of  
27 admission between those with a history of prior psychiatric admission and those without. Odds  
28 ratios were adjusted for age and deprivation quintile or for age only (deprivation quintile) and  
29 deprivation quintile (age only).  
30  
31  
32  
33

34 Finally, to assess the impact of perinatal mental illness on early child development after childbirth,  
35 we generated a pragmatic indicator for "at potential risk of adversity", defined as a child who was  
36 recorded as requiring intensive treatment at any time under the health plan indicators (HPI) and/or  
37 who had no record of completing three doses of the 5 in 1 vaccine by 12 months. The HPI is assessed  
38 at first visit, at six to eight weeks. For the HPI three possible outcomes can be recorded by the  
39 Health Visitor for the level of care required ('core', 'additional' and 'intensive'). It should be noted  
40 that results should be interpreted cautiously as there has been inconsistency in the implementation  
41 of the HPI across health boards and others have not validated this measure. Please also note that the  
42 time of assessment is not related to the time of first admission and is not an assessment of the  
43 admission care.  
44  
45  
46  
47  
48  
49  
50

#### 51 ETHICAL CONSIDERATIONS:

52  
53 Ethical approval for this study was obtained by the NHS Privacy Advisory Committee (PAC)  
54 (XRB12089).  
55

#### 56 RESULTS:

57  
58  
59  
60

1  
2  
3 In total 190 (11.0%) of this sample were admitted to a specialist MBU in Scotland. Table 1 highlights  
4 some important differences between MBU versus non-MBU admissions. Firstly, women admitted to  
5 an MBU were significantly more likely to be admitted with non-affective psychosis (OR = 1.97, 95%CI  
6 1.22-3.18), affective psychosis (OR = 2.44, 95%CI 1.37-4.33) and non-psychotic depressive episodes  
7 (OR = 1.93, 95%CI 1.42-2.63). It is also notable that women admitted to an MBU were significantly  
8 more likely to live within affluent areas (and less likely to come from deprived areas) and in general  
9 more likely to be from an older age group (31-35, 36-40 and over 40) (Table 1). Women admitted to  
10 an MBU were largely from the NHS Greater Glasgow and Clyde Health Board area (54.2% overall).

11  
12  
13  
14  
15  
16  
17  
18 Table 1 also shows that MBU admissions were significantly less likely to have had a previous  
19 pregnancy and less likely to have had a previous psychiatric admission. It also highlights important  
20 differences in length of stay for MBU versus non-MBU admissions. It shows that women admitted to  
21 an MBU were significantly less likely to have brief stays in hospital (of 10 days or less) but  
22 significantly more likely to have stays of more than 10 days, and more than twice as likely to have  
23 had a stay of 21-40 days or 40 days or more.

24  
25  
26  
27  
28  
29 In total 562 (32.5%) of the 1,730 women had a history of prior psychiatric admission. Table 2 shows  
30 that this group were more likely to be admitted with a diagnosis of affective psychosis (7.3% vs.  
31 2.6%, adjusted OR = 3.00, 95%CI 1.82-4.94) and non-affective psychosis (10.0% vs. 6.4%, adjusted OR  
32 = 1.55, 95%CI 1.07-2.25) but less likely to have an admission for a postpartum or non-psychotic  
33 depressive episode diagnosis. Those with a previous history of psychiatric admission were also  
34 significantly more likely to be located in the two most deprived quintiles and less likely to come from  
35 the two most affluent quintiles. Table 2 also shows they were less likely to be under 26 but  
36 significantly more likely to be from the 31-35,36-40 and over 40 age groups. No significant  
37 differences were identified for length of stay, previous pregnancy or time of admission.

38  
39  
40  
41  
42  
43  
44  
45 Table 3 shows that 518 (29.9%) of offspring were defined as being “at potential risk of adversity”  
46 according to our criteria as assessed at the first Health Visitor visit after childbirth. Those at “potential  
47 risk” were more likely (although not statistically significantly) to have had a mother with non-  
48 affective psychosis (OR = 1.37, 95%CI 0.94-2.01) and significantly less likely to have a mother with a  
49 diagnosis of non-psychotic depression (OR = 0.65, 95%CI 0.51-0.83). It is notable that they were  
50 significantly more likely to come from the most deprived quintiles and less likely to be from more  
51 affluent quintiles. No differences were found by age of mother nor by place of first admission either  
52  
53  
54  
55  
56  
57  
58  
59  
60



1  
2  
3 at a MBU or a non-MBU. Those children identified as “at potential risk of adversity” were more likely  
4 to have had a mother with a history of a previous psychiatric admission.  
5  
6

#### 7 8 DISCUSSION:

9  
10 The aim of this study was to assess the extent to which sociodemographic factors and perinatal  
11 mental illness affects treatment and outcomes for both mothers and children. We covered two  
12 main areas: admissions to an MBU and factors associated with children identified as at “potential  
13 risk of childhood adversity”.  
14  
15

16  
17 In this large Scottish sample, women admitted to a one of the two Scottish MBUs (compared to  
18 women admitted to general psychiatry wards) were significantly more likely be diagnosed with a  
19 psychotic illness (non-affective psychotic illness or affective psychotic illness) and less likely to be  
20 admitted with other illnesses. There was no difference for early post-partum psychosis admissions  
21 between MBU and non MBU. This is in keeping with the notion that MBU admission is reserved for  
22 women suffering from the most serious mental disorders such as postpartum psychosis, mania,  
23 major depressive episodes with psychosis or schizophrenia [18].  
24  
25  
26  
27  
28

29  
30 Women admitted to an MBU (compared to women admitted to general psychiatry wards) were  
31 more likely to live within affluent areas and in general more likely to be from an older age group (36-  
32 40 and over 40). It is possible that differences in socio-demographics of women accessing MBUs,  
33 might reflect a health inequality in terms of access to MBU admission. However this is a question,  
34 which requires further research.  
35  
36  
37  
38

39  
40 To date literature exploring accessibility to MBUs is limited. There is one recent systematic review  
41 investigating outcomes for women admitted to a mother and baby unit[25]. However accessibility to  
42 an MBU was not reported. There are other studies on women admitted to an MBU, but they give  
43 only results on the socio-economic status of women and no objective marker of deprivation (such as  
44 SIMD) is usually included[25]. Studies investigating the link between deprivation and admission rate  
45 are limited. Some authors have described a link between psychiatric diagnoses, deprivation and  
46 admission rate[26] (in the general adult setting) while others have suggested a link between socio-  
47 economic status and admission to forensic psychiatry services[27]. However further detailed  
48 investigation in this area is required.  
49  
50  
51  
52  
53  
54  
55  
56  
57  
58  
59  
60

1  
2  
3 In our study we found that women admitted to an MBU were more likely to have a longer average  
4 length of stay (40 plus days). This may be related to the need for a higher level of social functioning  
5 to ensure safe care for mothers and their babies on discharge from hospital. Further investigation  
6 comparing average length of stay in an MBU with particular focus on the cost effectiveness of MBUs  
7 may be warranted.  
8  
9  
10

11  
12 Several notable findings arose from our comparison of mothers of children identified as “at potential  
13 risk of adversity”. Firstly, almost one-third (29%) of children fell into this category. This rate is similar  
14 to that reported by others. For example, Whitmore and colleagues[28] reported that social services  
15 were involved in 31.6% of all admissions to their MBU in Birmingham and 10% of admissions  
16 resulted in separate discharges[28]. Howard and colleagues[29] reported that 23% of women were  
17 discharged with their babies under some form of social services supervision[29].  
18  
19  
20  
21  
22

23  
24 Secondly, our findings indicate that children in the “at potential risk of adversity” group were more  
25 likely to come from deprived locations, have mothers with a previous psychiatric admission and have  
26 had a mother admitted with a non-affective psychosis (schizophrenia). This finding is also similar to  
27 that by others [18,28-30] who reported that women with a diagnosis of schizophrenia were  
28 discharged separately more often than other groups. Potential risk factors associated with risk of  
29 separation are complex, but include: neonatal or infant medical problems or complications; maternal  
30 psychiatric disorder; paternal psychiatric disorder; maternal lack of good relationship with others;  
31 mother receipt of disability benefits; and low social class[30]. In particular schizophrenia, personality  
32 disorder, and poor social integration have all been related to poor clinical outcomes[31].  
33  
34  
35  
36  
37  
38  
39

40 Successful parenting is complex, but may be partly associated with family stability and access to  
41 financial and social resources[32]. While it is recognised that mothers with severe mental illness,  
42 have specific needs relating to their children, their health and social care needs may not always be  
43 readily identified by healthcare professionals[33]. In cases of separate discharge, additional support  
44 should be made available to minimise distress. Therefore taken together, our findings suggest that  
45 there may be some benefit to identifying mothers at particularly high risk in terms of adverse  
46 developmental outcomes for their children, such as mothers living in more deprived communities  
47 who have a history of previous psychiatric admissions for schizophrenia.  
48  
49  
50  
51  
52  
53  
54  
55  
56  
57  
58  
59  
60

1  
2  
3 STRENGTHS AND LIMITATIONS:  
4

5 Strengths of this study include the completeness of the sample, which was obtained from record  
6 linkage for the whole of Scotland. However, some limitations in this work are acknowledged. Firstly,  
7 only psychiatric admission data were used, with no use of out-patient data. Our findings are  
8 therefore focused on the more severe end of the mental illness spectrum. Although we were able to  
9 determine if individuals had had a previous psychiatric admission, information about the number of  
10 previous admissions, family support, or access to Crisis teams were not available. The comparisons  
11 of women admitted to MBUs with women admitted to general psychiatric wards needs to be  
12 interpreted cautiously. This is particularly in relation to the timing of admissions in relation to  
13 childbirth, as women will only be admitted to MBUs in the very late stages of pregnancy and in the  
14 first year post-delivery. The general psychiatric admissions included admissions up to 2 years pre  
15 delivery and 2 years post-delivery and may therefore include women with long-term illnesses.  
16  
17  
18  
19  
20  
21  
22  
23

24 Furthermore, limited information about time and length stay at an MBU prevented any cost analysis  
25 being undertaken. Our definition of “at potential risk of adversity” in offspring was a composite and  
26 pragmatic measure derived from the limited child health outcome data which was available to us  
27 from record linkage. There has also been some inconsistency in the implementation of the HPI  
28 across health boards. A more detailed and comprehensive assessment of child development in this  
29 group of mothers is therefore warranted.  
30  
31  
32  
33  
34

35 CONCLUSION:  
36

37 In conclusion, this study found that a health informatics/data linkage approach has considerable  
38 potential for improving our understanding of the social and clinical factors, which contribute to  
39 perinatal mental illness in mothers in Scotland, as well as potential adverse developmental  
40 outcomes for their children. To date there has been no systematic assessment of the benefits (or  
41 adverse effects) of specialised MBUs in Scotland. Given the current political-economic climate and  
42 the importance of early intervention, further research in this area would be of benefit.  
43  
44  
45  
46  
47  
48  
49  
50  
51  
52  
53  
54  
55  
56  
57  
58  
59  
60

**Table 1. Comparison of characteristics of women admitted either with their infant to a Mother-Baby Unit (MBU) or without their infant to a psychiatric ward (Non-MBU) (N=1729)**

|                                        | MBU admission | Non-MBU admission | Odds ratio, adjusted by age and deprivation (95%CI) |
|----------------------------------------|---------------|-------------------|-----------------------------------------------------|
|                                        | Number (%)    | Number (%)        |                                                     |
| Total                                  | 190 (11.0)    | 1,539 (89)        |                                                     |
| <b>Diagnosis</b>                       |               |                   |                                                     |
| Non affective psychosis                | 24 (12.6)     | 107 (7.0)         | 1.97 (1.22-3.18)                                    |
| Affective psychosis                    | 18 (9.5)      | 53 (3.4)          | 2.44 (1.37-4.33)                                    |
| Post-partum (0-12 weeks) psychosis     | 18 (9.5)      | 87 (5.7)          | 1.56 (0.91-2.70)                                    |
| Non psychotic depressive episodes      | 85 (44.7)     | 447 (29.0)        | 1.93 (1.42-2.63)                                    |
| Any other diagnosis                    | 130 (68.4)    | 1,292 (84.0)      | 0.45 (0.32-0.63)                                    |
| <b>Deprivation Quintile</b>            |               |                   |                                                     |
| Most deprived (1)                      | 64 (33.7)     | 656 (43.4)        | 0.68 (0.49-0.93)                                    |
| 2                                      | 34 (17.9)     | 336 (22.2)        | 0.76 (0.51-1.13)                                    |
| 3                                      | 28 (14.7)     | 246 (16.3)        | 0.88 (0.58-1.31)                                    |
| 4                                      | 37 (19.5)     | 169 (10.2)        | 2.00 (1.35-2.96)                                    |
| Least deprived (5)                     | 27 (14.2)     | 105 (6.9)         | 2.33 (1.49-3.65)                                    |
| <b>Age group</b>                       |               |                   |                                                     |
| Under 20                               | 16 (8.4)      | 172 (11.2)        | 0.78 (0.45-1.34)                                    |
| 20-25                                  | 40 (21.1)     | 465 (30.2)        | 0.65 (0.45-0.95)                                    |
| 26-30                                  | 47 (24.7)     | 407 (26.4)        | 0.90 (0.63-1.29)                                    |
| 31-35                                  | 50 (26.3)     | 293 (19.0)        | 1.38 (0.97-1.96)                                    |
| 36-40                                  | 31 (16.3)     | 170 (11.0)        | 1.49 (1.03-1.58)                                    |
| Over40                                 | 6 (3.2)       | 32 (2.1)          | 1.55 (0.63-3.80)                                    |
| <b>Length of admission</b>             |               |                   |                                                     |
| Five days or less                      | 35 (18.4)     | 640 (41.6)        | 0.34 (0.23-0.50)                                    |
| 6-10 days                              | 25 (13.2)     | 320 (20.8)        | 0.59 (0.39-0.92)                                    |
| 11-20 days                             | 42 (22.1)     | 274 (17.8)        | 1.27 (0.86-1.85)                                    |
| 21-40 days                             | 49 (25.8)     | 172 (11.2)        | 2.51 (1.73-3.63)                                    |
| 40 plus days                           | 39 (20.4)     | 133 (8.6)         | 2.48 (1.65-3.71)                                    |
| <b>Geographical Location</b>           |               |                   |                                                     |
| Greater Glasgow and Clyde              | 103 (54.2)    | 389 (25.3)        | 3.50 (2.57-4.76)                                    |
| Lothian                                | 55 (29.0)     | 169 (11.0)        | 3.30 (2.32-4.96)                                    |
| Lanarkshire                            | 12 (6.3)      | 169 (11.0)        | 0.54 (0.29-1.00)                                    |
| Any other Health Board                 | 20 (10.5)     | 812 (52.7)        | 0.02 (0.01 to 0.03)                                 |
| Had previous pregnancy                 | 95 (50.0)     | 935 (60.8)        | 0.57 (0.41-0.78)                                    |
| History of prior psychiatric admission | 43 (22.6)     | 519 (33.7)        | 0.57 (0.40-0.83)                                    |
| <b>Time of first admission</b>         |               |                   |                                                     |
| Post-partum (0-12-weeks)               | 102 (53.7)    | 125 (8.1)         | 11.96 (8.4-16.8)                                    |

Note: women could have more than one diagnosis so numbers are greater than the number of women. In total 27 women had no Scottish Index of Multiple Deprivation (SIMD) quintile assigned due to missing or incorrect postcode and were excluded from the regression analysis for all variables

**Table 2. Comparison of characteristics of women with and without a previous psychiatric admission prior to the index admission (N=1720).**

|                                   | Previous admission<br>Number (% of total) | No previous admission<br>Number (% of total) | Odds ratio adjusted by<br>age and deprivation<br>(95%CI) |
|-----------------------------------|-------------------------------------------|----------------------------------------------|----------------------------------------------------------|
| Total                             | 562 (32.5)                                | 1,168 (67.5)                                 |                                                          |
| <b>Diagnosis</b>                  |                                           |                                              |                                                          |
| Non affective psychosis           | 56 (10.0)                                 | 75 (6.4)                                     | 1.55 (1.07-2.25)                                         |
| Affective psychosis               | 41 (7.3)                                  | 30 (2.6)                                     | 3.00 (1.82-4.94)                                         |
| Post-partum psychosis             | 57 (10.1)                                 | 170 (14.6)                                   | 0.36 (0.20-0.64)                                         |
| Non psychotic depressive episodes | 137 (24.4)                                | 395 (33.8)                                   | 0.63 (0.50-0.79)                                         |
| Any other diagnosis               | 450 (80.1)                                | 973 (83.3)                                   | 0.78 (0.60-1.02)                                         |
| <b>Deprivation Quintile</b>       |                                           |                                              |                                                          |
| Most deprived                     | 251 (45.7)                                | 470 (40.7)                                   | 1.31 (1.07-1.61)                                         |
| 2                                 | 131 (23.9)                                | 239 (20.7)                                   | 1.11 (0.87-1.42)                                         |
| 3                                 | 85 (15.5)                                 | 189 (16.4)                                   | 0.90 (0.68-1.20)                                         |
| 4                                 | 54 (9.8)                                  | 152 (13.2)                                   | 0.68 (0.49-0.95)                                         |
| Least deprived                    | 28 (5.1)                                  | 104 (9.0)                                    | 0.48 (0.31-0.75)                                         |
| <b>Age group</b>                  |                                           |                                              |                                                          |
| Under 20                          | 37 (6.6)                                  | 152 (13.0)                                   | 0.44 (0.30-0.64)                                         |
| 20-25                             | 146 (26.0)                                | 359 (30.7)                                   | 0.78 (0.62-0.98)                                         |
| 26-30                             | 160 (28.5)                                | 294 (25.2)                                   | 1.19 (0.95-1.50)                                         |
| 31-35                             | 126 (22.4)                                | 217 (18.6)                                   | 1.31 (1.01-1.68)                                         |
| 36-40                             | 80 (14.2)                                 | 121 (10.4)                                   | 1.45 (1.07-1.97)                                         |
| Over40                            | 13 (2.3)                                  | 25 (2.1)                                     | 1.01 (0.50-2.03)                                         |
| <b>Length of stay</b>             |                                           |                                              |                                                          |
| Five days or less                 | 203 (36.1)                                | 472 (40.4)                                   | 0.87 (0.70-1.09)                                         |
| 6-10 days                         | 112 (19.9)                                | 234 (20.0)                                   | 0.99 (0.76-1.28)                                         |
| 11-20 days                        | 104 (18.5)                                | 212 (18.2)                                   | 0.95 (0.73-1.24)                                         |
| 21-40 days                        | 71 (12.6)                                 | 150 (12.8)                                   | 0.99 (0.73-1.26)                                         |
| 40 plus days                      | 72 (12.8)                                 | 100 (8.6)                                    | 1.50 (1.07-2.09)                                         |
| Had previous pregnancy            | 359 (63.9)                                | 671 (57.5)                                   | 1.03 (0.82-1.29)                                         |
| <b>Time of first admission</b>    |                                           |                                              |                                                          |
| Post-partum (0-12-weeks)          | 57 (10.1)                                 | 170 (14.6)                                   | 0.71 (0.48-1.02)                                         |

Note: women could have more than one diagnosis so numbers are greater than the number of women. In total 27 women had no Scottish Index of Multiple Deprivation (SIMD) quintile assigned due to missing or incorrect postcode and were excluded from the regression analysis for all variables

**Table 3. Characteristics of mothers with children defined as being at 'potential risk of adversity' (N=1720)**

|                                        | <b>At potential risk of adversity</b> | <b>Not at potential risk of adversity</b> | <b>Odds ratio adjusted by age and deprivation (95%CI)</b> |
|----------------------------------------|---------------------------------------|-------------------------------------------|-----------------------------------------------------------|
|                                        | Number (% of total)                   | Number (% of total)                       |                                                           |
| <b>Total</b>                           | 518 (29.9)                            | 1,212 (70.1)                              |                                                           |
| MBU Stay                               | 58 (30.4)                             | 133 (69.6)                                | 1.18 (0.84-1.65)                                          |
| General Ward                           | 459 (29.8)                            | 1,079 (70.2)                              | 1                                                         |
| <b>Diagnosis</b>                       |                                       |                                           |                                                           |
| Non affective psychosis                | 49 (9.5)                              | 82 (6.7)                                  | 1.37 (0.94-2.01)                                          |
| Affective psychosis                    | 22 (4.3)                              | 49 (4.0)                                  | 1.24 (0.73-2.12)                                          |
| Post-partum psychosis                  | 21 (4.1)                              | 84 (6.9)                                  | 0.62 (0.37-1.03)                                          |
| Non psychotic depressive episodes      | 127 (24.5)                            | 405 (33.4)                                | 0.65 (0.51-0.83)                                          |
| Any other diagnosis                    | 426 (82.2)                            | 997 (82.3)                                | 0.93 (0.70-1.22)                                          |
| <b>Deprivation Quintile</b>            |                                       |                                           |                                                           |
| Most deprived                          | 274 (54.0)                            | 448 (37.5)                                | 1.88 (1.52-2.32)                                          |
| 2                                      | 112 (22.1)                            | 227 (21.5)                                | 1.03 (0.80-1.33)                                          |
| 3                                      | 61 (12.0)                             | 214 (17.9)                                | 0.61 (0.45-0.84)                                          |
| 4                                      | 36 (7.1)                              | 169 (14.1)                                | 0.46 (0.32-0.68)                                          |
| Least deprived                         | 24 (7.3)                              | 108 (9.3)                                 | 0.51 (0.32-0.81)                                          |
| <b>Age group</b>                       |                                       |                                           |                                                           |
| Under 20                               | 61 (11.8)                             | 128 (10.6)                                | 1.02 (0.73-1.45)                                          |
| 20-25                                  | 154 (29.7)                            | 351 (29.0)                                | 0.91 (0.72-1.15)                                          |
| 26-30                                  | 154 (29.7)                            | 300 (24.8)                                | 1.32 (0.98-1.67)                                          |
| 31-35                                  | 90 (17.4)                             | 253 (20.9)                                | 0.90 (0.69-1.17)                                          |
| 36-40                                  | 47 (9.1)                              | 154 (12.7)                                | 0.73 (0.51-1.03)                                          |
| Over40                                 | 12 (2.3)                              | 26 (2.2)                                  | 1.15 (0.56-2.33)                                          |
| <b>Length of stay</b>                  |                                       |                                           |                                                           |
| Five days or less                      | 213 (41.1)                            | 456 (37.6)                                | 1.16 (0.93-1.44)                                          |
| 6-10 days                              | 103 (19.9)                            | 244 (20.1)                                | 0.91 (0.70-1.19)                                          |
| 11-20 days                             | 93 (18.0)                             | 223 (18.4)                                | 0.98 (0.73-1.29)                                          |
| 21-40 days                             | 48 (11.2)                             | 166 (13.7)                                | 0.84 (0.60-1.17)                                          |
| 40 plus days                           | 51 (9.9)                              | 123 (10.2)                                | 0.98 (0.68-1.40)                                          |
| Had previous pregnancy                 | 319 (61.6)                            | 711 (58.9)                                | 1.11 (0.89-1.40)                                          |
| History of prior psychiatric admission | 215 (41.5)                            | 347 (28.6)                                | 1.76 (1.41-2.21)                                          |
| <b>Time of first admission</b>         |                                       |                                           |                                                           |
| Post-partum (0-12-weeks)               | 73 (14.1)                             | 154 (12.7)                                | 1.31 (0.96-1.79)                                          |

Note: women could have more than one diagnosis so numbers are greater than the number of women. In total 27 women had no Scottish Index of Multiple Deprivation (SIMD) quintile assigned due to missing or incorrect postcode and were excluded from the regression analysis for all variables  
 Note: "at potential risk of adversity", is defined as a child who was recorded as requiring intensive treatment at any time under the health plan indicators (HPI) and/or who had no record of completing three doses of the 5 in 1 vaccine by 12 months. HPI is assessed at first visit and at six to eight weeks.

1  
2  
3 Contributor ship statement:

4 GM undertook the data analyses. JLM and DJM wrote the initial draft of the paper. GM, RC and DJM  
5 were involved in the drafting of the paper  
6  
7

8 Competing interests:

9 All authors report no competing interests.  
10  
11

12 Funding:

13 This project was funded by a CSO Health Informatics Call Grant  
14  
15

16 Data sharing statement:

17 Data included in the study are available to the authors only  
18  
19  
20  
21  
22  
23  
24  
25  
26  
27  
28  
29  
30  
31  
32  
33  
34  
35  
36  
37  
38  
39  
40  
41  
42  
43  
44  
45  
46  
47  
48  
49  
50  
51  
52  
53  
54  
55  
56  
57  
58  
59  
60

## REFERENCES:

- 1 Stein A, Pearson RM, Goodman SH, Rapa E, Rahman A, McCallum M, Howard LM, Pariante CMEffects of perinatal mental disorders on the fetus and child. *Lancet*. 2014 Nov 15;384(9956):1800-19. doi: 10.1016/S0140-6736(14)61277-0. Epub 2014 Nov 14.
- 2 Milgrom J, Ericksen J, Sved-Williams A. Chapter Impact of Parental Psychiatric Illness on Infant Development in Sutter-Dallay A-L, Glangeaud-Freudenthal NM-C, Guedeney A, Riecher-Rössler A (eds) Joint care of parents and infants in perinatal psychiatry. 2016, Springer,47-78.
- 3 Leis JA, Heron J, Stuart EA, Mendelson T. Associations between maternal mental health and child emotional and behavioral problems: does prenatal mental health matter? *J Abnorm Child Psychol* 2013; 42: 161–71
- 4 Yarrow L.J., MacTurk R.H., Vietze P.M., McCarthy M.E., Klein R.P., McQuinston S. Development course of parental stimulation and its relationship to mastery motivation during infancy. *Developmental Psychology*. 1984;20:492–503.
- 5 Murray L., Halligan S.L., & Cooper P.J. Effects of postnatal depression on mother-infant interactions, and child development In Wachs B.G., editor. (Ed.), 2010 Handbook of infant development (pp. 192–220). Malden: Wiley-Blackwell.
- 6 Hughes C, Roman G, Hart MJ, Ensor R. Does maternal depression predict young children's executive function? - a 4-year longitudinal study. *J Child Psychol Psychiatry*. 2013 Feb;54(2):169-77. doi: 10.1111/jcpp.12014. Epub 2012 Nov
- 7 Sutter-Dallay AL, Murray L, Dequae-Merchadou L, Glatigny-Dallay E, Bourgeois ML, Verdoux H.A prospective longitudinal study of the impact of earlypostnatalvs. chronicmaternaldepressive symptoms on child development. *Eur Psychiatry*.2011 Nov;26(8):484-9. doi: 10.1016/j.eurpsy.2010.05.004. Epub 2010 Jul 10
- 8 O'Hara MW, Swain AM Rates and risk of postpartum depression: a meta-analysis *Int Rev Psychiatry*, 1996, 8 :37–54
- 9 Pearlstein T, Howard M, Salisbury A, Zlotnick C. Postpartum depression *Am J ObstetGynecol*, 2009. 200: 357–364
- 10 Terp IM, Mortensen PB. Post-partum psychoses. Clinical diagnoses and relative risk of admission after parturition. *Br J Psychiatry* 1998;172:521–6.
- 11 Wisner KL, Peindl K, Hanusa BH. Symptomatology of affective and psychotic illnesses related to childbearing. *J Affect Disord* 1994;30:77–87. doi:10.1016/0165-0327(94)90034-5
- 12 Brockington IF. Oxford: Oxford University Press; 1996. Motherhood and Mental Health
- 13 Brockington I, Butterworth R, Glangeaud-Freudenthal N.An international position paper on mother-infant (perinatal) mental health, with guidelines for clinical practice.*Archives of Women's Mental Health*. 2017;20(1):113-120. doi:10.1007/s00737-016-0684-7.



1  
2  
3 14 Cazas O, Glangeaud-Freudenthal NM-C. The history of Mother-Baby Units (MBUs) in France and  
4 Belgium and of the French version of the Marcé checklist. *Archives of Women's Mental Health*.  
5 2004;7(1):53-58. doi:10.1007/s00737-003-0046-0.  
6

7 15 SIGN 127 Management of perinatal mood disorders Available at:  
8 <http://www.sign.ac.uk/pdf/sign127.pdf> Accessed 01/03/2017  
9

10  
11 16 Langan-Martin, J., McLean, G., Cantwell, R., and Smith, D. J. Admission to psychiatric hospital in  
12 the early and late post-partum periods: Scottish national linkage study. *BMJ Open*, 2016 6(1),  
13 e008758. (doi:10.1136/bmjopen-2015-008758)(MID:26733566)  
14

15 17 Munk-Olsen T, Laursen TM, Pedersen CB et al New parents and mental disorders: a population-  
16 based registered study. *JAMA* 2006 296:2582–2589  
17

18  
19 18 Glangeaud-Freudenthal NM, Howard LM, Sutter-Dallay AL. Treatment - mother-infant inpatient  
20 units. *Best Pract Res Clin Obstet Gynaecol*. 2014 Jan;28(1):147-57. doi:  
21 10.1016/j.bpobgyn.2013.08.015. Epub 2013 Sep 3.  
22

23  
24 19 Royal College of Psychiatrists Quality Network for Perinatal Mental Health Services  
25 (2016). <http://www.rcpsych.ac.uk/pdf/Annual%20Inpatient%20Report%20Final%20Draft.pdf>  
26 Accessed 16/03/2017  
27

28 20 Neil S, Sanderson H, Wieck A (2006) A satisfaction survey of women admitted to a psychiatric  
29 mother and baby unit in the northwest of England. *Arch Womens Ment Health* 2006: 9:109–112.  
30

31 21 Bellis MA, Hughes K, Leckenby N, Hardcastle KA, Perkins C, Lowey H. Measuring mortality and the  
32 burden of adult disease associated with adverse childhood experiences in England: a national survey.  
33 *J Public Health (Oxf)*. 2015; 37(3):445-54. doi: 10.1093/pubmed/fdu065. Epub 2014 Aug 30.  
34

35  
36 22 Felitti VJ, Anda RF, Nordenberg D, Williamson DF, Spitz AM, Edwards V, Koss MP, Marks JS.  
37 Relationship of childhood abuse and household dysfunction to many of the leading causes of death  
38 in adults. The Adverse Childhood Experiences Study. *Am J Prev Med*. 1998;14:245–258  
39

40 23 STATA: <https://www.stata.com/stata-news/news28-4/stata13.1/>  
41

42 24 SIMD Scotland [http://simd.scotland.gov.uk/publication-2012/introduction-to-simd-](http://simd.scotland.gov.uk/publication-2012/introduction-to-simd-2012/overview-of-the-simd/what-is-the-simd/)  
43 [2012/overview-of-the-simd/what-is-the-simd/](http://simd.scotland.gov.uk/publication-2012/introduction-to-simd-2012/overview-of-the-simd/what-is-the-simd/) Accessed 09/05/2017  
44

45 25 Gillham R, Wittkowski A. Outcomes for women admitted to a mother and baby unit: a systematic  
46 review. *International Journal of Women's Health*. 2015;7:459-476. doi:10.2147/IJWH.S69472.  
47

48 26 Harrison J, Barrow S, Creed F. Social deprivation and psychiatric admission rates among different  
49 diagnostic groups. *Br J Psychiatry*. 1995 Oct;167(4):456-62.  
50

51  
52 27 Coid J, Kahtan N, Cook A, Gault S, Jarman B. Predicting admission rates to secure forensic  
53 psychiatry services. *Psychol Med*. 2001 Apr;31(3):531-9.  
54

55 28 Whitmore J, Heron J, Wainscott G. Predictors of parenting concern in a Mother and Baby Unit over  
56 a 10-year period. *Int J Soc Psychiatry*. 2011 Sep;57(5):455-61. doi: 10.1177/0020764010365412.  
57 Epub 2010 Apr 13.  
58  
59  
60

1  
2  
3  
4 29 Howard LM, Thornicroft G, Salmon M, Appleby L Predictors of parenting outcome in women with  
5 psychotic disorders discharged from mother and baby units. *Acta Psychiatr Scand*. 2004  
6 Nov;110(5):347-55.  
7

8 30 Glangeaud NM Sutter-Dallay AL, Thieulin AC, Dagens V, Zimmermann MA, Debourg A, Amzallag C,  
9 Cazas O, Cammas R, Klopfert ME, Rainelli C, Tielemans P, Mertens C, Maron M, Nezelof S, Poinso F.  
10 Predictors of infant foster care in cases of maternal psychiatric disorders  
11 *Soc Psychiatry Psychiatr Epidemiol* 2013; 48:553–561  
12

13 31 Glangeaud NM, Sutter AL, Thieulin AC, Dagens-Lafont V, Zimmermann MA, Debourg A, Massari B,  
14 Cazas O, Cammas R, Rainelli C, Poinso F, Maron M, Nezelof S, Ancel PY, Khoshnood B. *European*  
15 *Psychiatry* 2011; 26: 215–223 doi:10.1016/j.eurpsy.2010.03.006  
16

17 32 Abel KM, Webb RT, Salmon MP, Wan MW, Appleby L. Prevalence and predictors of parenting  
18 outcomes in a cohort of mothers with schizophrenia admitted for joint mother and baby psychiatric  
19 care in England. *J Clin Psychiatry* 2005; 66:781–789.  
20

21 33 Howard LM, Hunt K The needs of mothers with severe mental illness: a comparison of  
22 assessments of needs by staff and patients. *Arch Womens Ment Health* 2008; 11:131–136.  
23  
24  
25  
26  
27  
28  
29  
30  
31  
32  
33  
34  
35  
36  
37  
38  
39  
40  
41  
42  
43  
44  
45  
46  
47  
48  
49  
50  
51  
52  
53  
54  
55  
56  
57  
58  
59  
60

## STROBE Statement—checklist of items that should be included in reports of observational studies

|                              | Item No | Page Number discussed                                                                                                                                                                                                                                                                                                   |
|------------------------------|---------|-------------------------------------------------------------------------------------------------------------------------------------------------------------------------------------------------------------------------------------------------------------------------------------------------------------------------|
| <b>Title and abstract</b>    | 1       | (a) Page 1<br>(b) Page 2                                                                                                                                                                                                                                                                                                |
| <b>Introduction</b>          |         |                                                                                                                                                                                                                                                                                                                         |
| Background/rationale         | 2       | Page 4                                                                                                                                                                                                                                                                                                                  |
| Objectives                   | 3       | Page 4                                                                                                                                                                                                                                                                                                                  |
| <b>Methods</b>               |         |                                                                                                                                                                                                                                                                                                                         |
| Study design                 | 4       | Page 5                                                                                                                                                                                                                                                                                                                  |
| Setting                      | 5       | Page 5                                                                                                                                                                                                                                                                                                                  |
| Participants                 | 6       | (a) <i>Cross-sectional study</i> —Page 5<br>(b) <i>No matching</i>                                                                                                                                                                                                                                                      |
| Variables                    | 7       | Page 5                                                                                                                                                                                                                                                                                                                  |
| Data sources/<br>measurement | 8*      | Page 5                                                                                                                                                                                                                                                                                                                  |
| Bias                         | 9       | Page 9                                                                                                                                                                                                                                                                                                                  |
| Study size                   | 10      | Page 5                                                                                                                                                                                                                                                                                                                  |
| Quantitative variables       | 11      | Page 5                                                                                                                                                                                                                                                                                                                  |
| Statistical methods          | 12      | (a) Page 5<br>(b) Describe any methods used to examine subgroups and interactions Page 5<br>(c) Explain how missing data were addressed Page 5<br>(d) <i>Cross-sectional study</i> —If applicable, describe analytical methods taking account of sampling strategy Page 5<br>(e) Describe any sensitivity analyses: n/a |

Continued on next page

**Results**

|                  |     |                                                                                                                                                                                                                                                                                                              |
|------------------|-----|--------------------------------------------------------------------------------------------------------------------------------------------------------------------------------------------------------------------------------------------------------------------------------------------------------------|
| Participants     | 13* | (a) Page 5<br>(b) n/a<br>(c) N/a                                                                                                                                                                                                                                                                             |
| Descriptive data | 14* | (a) Page 6<br>(b) n/a<br>(c) <i>Cohort study</i> —Summarise follow-up time (eg, average and total amount) n/a                                                                                                                                                                                                |
| Outcome data     | 15* | <i>Cohort study</i> —Report numbers of outcome events or summary measures over time<br><i>Case-control study</i> —Report numbers in each exposure category, or summary measures of exposure<br><i>Cross-sectional study</i> —Report numbers of outcome events or summary measures Pages 6 and 7 & Tables 1-4 |
| Main results     | 16  | (a) Pages 6 and 7 & Tables 1-4<br>(b) Report category boundaries when continuous variables were categorized n/a<br>(c) If relevant, consider translating estimates of relative risk into absolute risk for a meaningful time period – n/a                                                                    |
| Other analyses   | 17  | Report other analyses done—eg analyses of subgroups and interactions, and sensitivity analyses Pages 6 and 7 & Tables 1-4                                                                                                                                                                                    |

**Discussion**

|                  |    |                                                                                                                                                                                      |
|------------------|----|--------------------------------------------------------------------------------------------------------------------------------------------------------------------------------------|
| Key results      | 18 | Summarise key results with reference to study objectives Page 7                                                                                                                      |
| Limitations      | 19 | Discuss limitations of the study, taking into account sources of potential bias or imprecision. Discuss both direction and magnitude of any potential bias Pages 3 and 9             |
| Interpretation   | 20 | Give a cautious overall interpretation of results considering objectives, limitations, multiplicity of analyses, results from similar studies, and other relevant evidence Pages 7-9 |
| Generalisability | 21 | Discuss the generalisability (external validity) of the study results pages 7-9                                                                                                      |

**Other information**

|         |    |                                                                                                                                                                       |
|---------|----|-----------------------------------------------------------------------------------------------------------------------------------------------------------------------|
| Funding | 22 | Give the source of funding and the role of the funders for the present study and, if applicable, for the original study on which the present article is based page 14 |
|---------|----|-----------------------------------------------------------------------------------------------------------------------------------------------------------------------|
